# Supplementary material
Source: PubMed Central journal article supplement (PMC8217135)
Supplement: NIHMS1691692-supplement-Supp_tables___Supp_Figures.pdf [file NIHMS1691692-supplement-Supp_tables___Supp_Figures.pdf]

## 4.6 Supplementary tables

| Anatomical:                       |                       |          |            |                  |                  |
|-----------------------------------|-----------------------|----------|------------|------------------|------------------|
| Parameter                         | Lit. Val.             | Fit type | NAOMi Val. | Unit             | Refs             |
| Neural density                    | 9.20E+04              | Direct   | –          | mm <sup>-3</sup> | [58]             |
| Axonal diameter                   | 0.3                   | Direct   | –          | μm               | [58]             |
| Fraction vasculature              | 0.01-0.04             | Indirect | 0.032      | –                | [58, 75, 76]     |
| Fraction cell bodies              | 0.12                  | Indirect | 0.135      | –                | [58]             |
| Fraction neuropil                 | 0.84                  | Indirect | 0.833      | –                | [58]             |
| Fraction dendrites*               | 0.294                 | Indirect | 0.223      | –                | [58]             |
| Fraction other (fluorescing)*     | 0.401                 | Indirect | 0.33       | –                | [58]             |
| Fraction other (not fluorescing)* | 0.293                 | Indirect | 0.28       | –                | [58, 77]         |
| Vessel radius (capillary)         | 2.00E+00              | Direct   | –          | μm               | [56]             |
| Vessel radius (penetrating)       | 10 (9,11)             | Direct   | –          | μm               | [56]             |
| Vessel radius (surface)           | 4-30                  | Direct   | –          | μm               | [56]             |
| Vessel length                     | 50                    | Indirect | 50         | μm               | [56]             |
| Vessel orientation                | Uniform               | Indirect | Uniform    | –                | [56]             |
| Vascular density                  | 1-3                   | Indirect | 2          | %                | [56, 58, 75, 76] |
| Penetrating vessel density        | 30 <sup>†</sup>       | Direct   | –          | mm <sup>-2</sup> | [56]             |
| Somatic volume*                   | 1.80E+03 <sup>†</sup> | Indirect | 1.80E+03   | μm <sup>3</sup>  | [78]             |
| Nuclear volume*                   | 800 <sup>†</sup>      | Indirect | 800        | μm <sup>3</sup>  | [78]             |
| Cytoplasm volume*                 | 1000 <sup>†</sup>     | Indirect | 1000       | μm <sup>3</sup>  | [78]             |
| Somatic radius*                   | 6.25-7.5 <sup>†</sup> | Indirect | 7.5        | μm               | [60, 78]         |
| Nuclear radius*                   | 6 <sup>†</sup>        | Indirect | 6          | μm               | [78]             |
| Fraction cell bodies              | 0.12                  | Indirect | 0.135      | –                | [58]             |
| Basal dendrite endings            | 23-25 <sup>†</sup>    | Direct   | –          | –                | [59–61]          |
| Basal dendrite diameter           | 0.7                   | Direct   | –          | μm               | [79]             |
| Basal dendrite length             | 100-160 <sup>†</sup>  | Indirect | 105        | μm               | [59–61]          |
| Apical dendrite endings           | 6-20 <sup>†</sup>     | Direct   | –          | –                | [59, 60]         |
| Apical dendrite diameter          | 1-2                   | Direct   | –          | μm               | [80]             |
| Rall exponent                     | 1.5                   | Direct   | –          | –                | [116]            |

\*Adjusted for shrinkage: 31% [87],<sup>†</sup>Value estimated from data in the literature

Supplementary Table 1: Anatomical parameters used for *in-silico* simulation of neural activity in layer II/III of mouse primary visual area V1. Values for each parameter were either directly found in the literature or estimated from published data (entries with a †). The third column indicates whether these parameters were set directly in NAOMi, or were fit indirectly by setting other simulation parameters. In the latter cases, the measured values from a simulated NAOMi volume are shown for comparison, indicating that the simulated anatomy matches measured anatomical statistics.

| Fluorescence model:                               |            |          |            |                 |              |
|---------------------------------------------------|------------|----------|------------|-----------------|--------------|
| Parameter                                         | Anat. Val. | Fit type | NAOMi Val. | Unit            | Refs         |
| GCaMP6f binding affinity $K_d$                    | 290        | Direct   | –          | nMol            | [70]         |
| Baseline $\text{Ca}^{2+}$ concentration           | 50.00      | Direct   | –          | nMol            | [68]         |
| $\text{Ca}^{2+}$ axon diffusion constant $\gamma$ | 2800       | Direct   | –          | $\text{s}^{-1}$ | [67, 81, 84] |
| Endogenous $\text{Ca}^{2+}$ binding ratio $k_s$   | 100,110    | Direct   | 110        | AU              | [67, 81–83]  |
| $\text{Ca}^{2+}$ diffusion constant $\gamma$      | 1800       | Data fit | 292.3      | $\text{s}^{-1}$ | [67, 81, 82] |
| Onset time constant $\tau_{on}$                   | –          | Data fit | 98.62      | AU              | –            |
| Decay time constant $\tau_{off}$                  | –          | Data fit | 0.85       | AU              | –            |
| GCaMP6f Hill eqn. exponent $n_h$                  | 2.7        | Direct   | –          | AU              | [70]         |
| GCaMP6f Hill eqn. amplitude                       | 25.2       | Direct   | –          | F               | [70]         |
| Indicator concentration                           | 10-200     | Direct   | 10         | $\mu\text{M}$   | [68, 85, 86] |

Supplementary Table 2: Fluorescence parameters used for *in-silico* simulation of neural activity in layer II/III of mouse primary visual area V1. Values for each parameter were either directly found in the literature or estimated from published data (entries with a †). The third column indicates whether these parameters were set directly, or were fit indirectly by setting other simulation parameters. In the latter cases, the measured values simulated fluorescence traces are shown for comparison, indicating a good match between the NAOMi simulation and known activity statistics.

#### 4.7 Supplementary figures

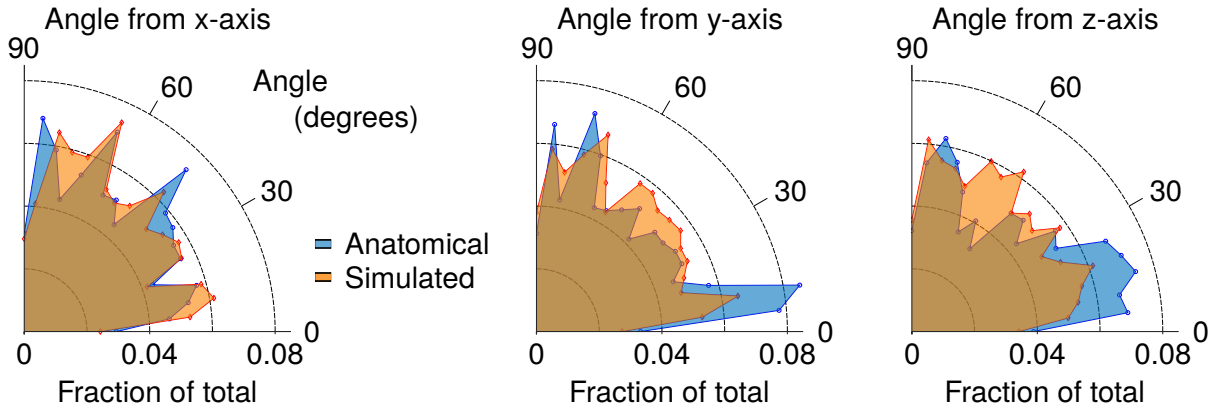

Supplementary Figure 1: Histograms comparing the distribution of simulated vasculature orientation (angles from the x- y- and z-axes) to distributions observed in data from [106].

| Optical:                          |                        |               |                        |
|-----------------------------------|------------------------|---------------|------------------------|
| Parameter                         | Value                  | Unit          | Refs                   |
| Refractive index (tissue average) | 1.35                   | –             | [117]                  |
| Refractive index (SD)             | 0.02                   | –             | [78, 117]              |
| Scatter size                      | [0.51 1.56 4.52 14.78] | $\mu\text{m}$ | [78, 102], See Methods |
| Scatter weight                    | [0.57 0.29 0.19 0.15]  | –             | [78, 102], See Methods |
| Wavelength $\lambda$              | 920                    | nm            | [118]                  |
| System aberrations (astigmatism)  | 0.1                    | $\lambda$     | See Methods            |
| System aberrations (spherical)    | 0.12                   | $\lambda$     | See Methods            |
| Hemoglobin absorption             | $0.00674 * \log(10)$   | –             | [108], See Methods     |
| Objective NA                      | 0.8                    | –             | [119]                  |
| PMT QE                            | 0.4                    | –             | [120]                  |
| eGFP Quantum Yield                | 0.6                    | –             | [118]                  |
| $\Delta$ , baseline $F_0$         | 2                      | GM            | [118]                  |
| $\Delta$ , saturation $F_{max}$   | 35                     | GM            | [118]                  |
| Sech pulse shape                  | 0.588                  | –             | [121]                  |
| Ti:S rep rate                     | 80                     | MHz           | [121]                  |
| Ti:S pulse width                  | 140                    | fs            | [121]                  |

Supplementary Table 3: Optical parameters used for *in-silico* simulation of two-photon microscopy scanning.

| Scanning:                 |                                                                       |        |                    |
|---------------------------|-----------------------------------------------------------------------|--------|--------------------|
| Parameter                 | Value                                                                 | Unit   | Refs               |
| PMT dynode model          |                                                                       |        | [122], See Methods |
| PMT Poisson-Gauss         | 1, 100 (mean photon,electronic)<br>0.23, 2300 (std photon,electronic) | counts | See Methods        |
| Bleed-through probability | 0.3                                                                   | –      | See Methods        |
| Bleed-through weight      | 0.4                                                                   | V*s    | See Methods        |
| PMT darkcount mean        | 0.05                                                                  | counts | See Methods        |

Supplementary Table 4: Scanning parameters used for *in-silico* simulation of two-photon microscopy scanning.

| Other parameters:           |            |          |            |               |              |
|-----------------------------|------------|----------|------------|---------------|--------------|
| Parameter                   | Anat. Val. | Fit type | NAOMi Val. | Unit          | Refs         |
| Axonal diameter             | 0.3        | Direct   | –          | $\mu\text{m}$ | [58]         |
| Fraction vasculature        | 0.01-0.04  | Indirect | 0.032      | –             | [58, 75, 76] |
| Fraction cell bodies        | 0.12       | Indirect | 0.135      | –             | [58]         |
| Fraction neuropil           | 0.84       | Indirect | 0.833      | –             | [58]         |
| Fraction spines*            | 0.118      | Indirect | 0          | –             | [58]         |
| Fraction dendrites*         | 0.294      | Indirect | 0.223      | –             | [58]         |
| Fraction Axons*             | 0.283      | Indirect | 0.33       | –             | [58]         |
| Fraction Glia*              | 0.0924     | Indirect | 0.08       | –             | [58]         |
| Fraction extracellular      | 0.2        | Direct   | 0.2        | –             | [77]         |
| *scaled to full volume [87] |            |          |            |               |              |

Supplementary Table 5: Detailed fractional volume of components

| 40 mW power  | CNMF (1091 total) |      |      | Suite2p (661 total) |      |      | PCA/ICA (265 total) |      |      |
|--------------|-------------------|------|------|---------------------|------|------|---------------------|------|------|
| Corr. cutoff | >0.1              | >0.3 | >0.5 | >0.1                | >0.3 | >0.5 | >0.1                | >0.3 | >0.5 |
| Paired       | 704               | 522  | 338  | 519                 | 479  | 423  | 170                 | 152  | 144  |
| Unique       | 566               | 438  | 303  | 366                 | 335  | 292  | 152                 | 139  | 137  |
| Doubled      | 95                | 54   | 27   | 68                  | 64   | 58   | 11                  | 9    | 7    |

Supplementary Table 6: Results of automated calcium imaging video segmentation as applied to simulated data generated from NAOMi. Of the total number of components isolated, only a fraction ( $\approx 30\% - 50\%$ ) unique, true cells in the scanned volume strongly matched the found components.

| 40 mW power          | Unique Cells found |      |      |
|----------------------|--------------------|------|------|
| Corr. cutoff         | >0.1               | >0.3 | >0.5 |
| CNMF (1091 total)    | 566                | 438  | 303  |
| Suite2p (1091 total) | 366                | 335  | 292  |
| PCA/ICA (265 total)  | 152                | 139  | 137  |
| CNMF Only            | 238                | 69   | 28   |
| Suite2p Only         | 43                 | 26   | 17   |
| PCA/ICA Only         | 13                 | 2    | 3    |
| CNMF & Suite2p       | 321                | 307  | 273  |
| CNMF & PCA/ICA       | 144                | 136  | 134  |
| Suite2p & PCA/ICA    | 134                | 137  | 134  |
| All algorithms       | 137                | 135  | 132  |

Supplementary Table 7: Results of automated calcium imaging video segmentation as applied to simulated data generated from NAOMi. While sets of found components largely overlapped between algorithms, each method’s design allowed for the extraction of slightly different cell activities.

| 40 mW power         | Unique Cells found |      |      |
|---------------------|--------------------|------|------|
| Corr. cutoff        | >0.1               | >0.3 | >0.5 |
| Ideal (8117 total)  | 2088               | 817  | 415  |
| Ideal & not CNMF    | 1523               | 383  | 120  |
| Ideal & not Suite2p | 1722               | 483  | 128  |
| Ideal & not PCA/ICA | 1936               | 678  | 278  |
| CNMF & not Ideal    | 1                  | 4    | 8    |
| Suite2p & not Ideal | 0                  | 1    | 5    |
| PCA/ICA & not Ideal | 0                  | 0    | 0    |

Supplementary Table 8: Results of automated calcium imaging video segmentation as applied to simulated data generated from NAOMi. De-mixing the data using oracle spatial profile knowledge allowed for isolating many more components, indicating that automated methods have room for improvement. Interestingly some algorithms, due to built in denoising not included in the ideal de-mixing, were able to isolate some cell time-traces more accurately.

| 80 mW power  | CNMF (999 total) |      |      | Suite2p (639 total) |      |      | PCA/ICA (635 total) |      |      |
|--------------|------------------|------|------|---------------------|------|------|---------------------|------|------|
| Corr. cutoff | >0.1             | >0.3 | >0.5 | >0.1                | >0.3 | >0.5 | >0.1                | >0.3 | >0.5 |
| Paired       | 651              | 546  | 460  | 532                 | 479  | 462  | 420                 | 322  | 292  |
| Unique       | 579              | 493  | 424  | 413                 | 369  | 358  | 337                 | 280  | 264  |
| Doubled      | 60               | 41   | 30   | 61                  | 54   | 53   | 47                  | 28   | 20   |

Supplementary Table 9: Results of automated calcium imaging video segmentation as applied to simulated data generated from NAOMi with 80 mW laser power.

| 80 mW power         | Unique Cells found |      |      |
|---------------------|--------------------|------|------|
| Corr. cutoff        | >0.1               | >0.3 | >0.5 |
| CNMF (999 total)    | 579                | 493  | 424  |
| Suite2p (639 total) | 413                | 369  | 358  |
| PCA/ICA (635 total) | 337                | 280  | 264  |
| CNMF Only           | 198                | 118  | 85   |
| Suite2p Only        | 46                 | 24   | 22   |
| PCA/ICA Only        | 90                 | 38   | 24   |
| CNMF & Suite2p      | 357                | 334  | 325  |
| CNMF & PCA/ICA      | 261                | 247  | 243  |
| Suite2p & PCA/ICA   | 240                | 242  | 240  |
| All algorithms      | 237                | 231  | 229  |

Supplementary Table 10: Results of automated calcium imaging video segmentation as applied to simulated data generated from NAOMi with 80 mW laser power.

| 80 mW power         | Unique Cells found |      |      |
|---------------------|--------------------|------|------|
| Corr. cutoff        | >0.1               | >0.3 | >0.5 |
| Ideal (8117 total)  | 3206               | 1528 | 904  |
| Ideal & not CNMF    | 2629               | 1036 | 481  |
| Ideal & not Suite2p | 2793               | 1159 | 546  |
| Ideal & not PCA/ICA | 2870               | 1248 | 640  |
| CNMF & not Ideal    | 3                  | 1    | 1    |
| Suite2p & not Ideal | 1                  | 0    | 0    |
| PCA/ICA & not Ideal | 2                  | 0    | 0    |

Supplementary Table 11: Results of automated calcium imaging video segmentation as applied to simulated data generated from NAOMi with 80 mW laser power.

| 40 mW power  | CNMF (1091 total) |      |      | Suite2p (661 total) |      |      | PCA/ICA (265 total) |      |      |
|--------------|-------------------|------|------|---------------------|------|------|---------------------|------|------|
| Corr. cutoff | >0.1              | >0.3 | >0.5 | >0.1                | >0.3 | >0.5 | >0.1                | >0.3 | >0.5 |
| Paired       | 261               | 212  | 156  | 246                 | 230  | 204  | 93                  | 84   | 77   |
| Unique       | 234               | 202  | 151  | 175                 | 166  | 143  | 83                  | 78   | 76   |
| Doubled      | 25                | 10   | 5    | 34                  | 28   | 25   | 5                   | 3    | 1    |

Supplementary Table 12: Somatic component recovery via automated calcium imaging video segmentation as applied to simulated data generated from NAOMi. Of the total number of components isolated, only a fraction ( $\approx 30\% - 50\%$ ) unique, true cells in the scanned volume strongly matched the found components.

| 40 mW power          | Unique Cells found |      |      |
|----------------------|--------------------|------|------|
| Corr. cutoff         | >0.1               | >0.3 | >0.5 |
| CNMF (1091 total)    | 234                | 202  | 151  |
| Suite2p (1091 total) | 175                | 166  | 143  |
| PCA/ICA (265 total)  | 83                 | 78   | 76   |
| CNMF Only            | 65                 | 44   | 12   |
| Suite2p Only         | 8                  | 8    | 4    |
| PCA/ICA Only         | 2                  | 0    | 0    |
| CNMF & Suite2p       | 167                | 158  | 139  |
| CNMF & PCA/ICA       | 83                 | 78   | 76   |
| Suite2p & PCA/ICA    | 81                 | 78   | 76   |
| All algorithms       | 81                 | 78   | 76   |

Supplementary Table 13: Somatic component recovery via automated calcium imaging video segmentation as applied to simulated data generated from NAOMi. While sets of found components largely overlapped between algorithms, each method’s design allowed for the extraction of slightly different cell activities.

| 40 mW power         | Unique Cells found |      |      |
|---------------------|--------------------|------|------|
| Corr. cutoff        | >0.1               | >0.3 | >0.5 |
| Ideal (451 total)   | 395                | 248  | 161  |
| Ideal & not CNMF    | 161                | 48   | 14   |
| Ideal & not Suite2p | 220                | 83   | 20   |
| Ideal & not PCA/ICA | 312                | 170  | 85   |
| CNMF & not Ideal    | 0                  | 2    | 4    |
| Suite2p & not Ideal | 0                  | 1    | 2    |
| PCA/ICA & not Ideal | 0                  | 0    | 0    |

Supplementary Table 14: Somatic component recovery via automated calcium imaging video segmentation as applied to simulated data generated from NAOMi. De-mixing the data using oracle spatial profile knowledge allowed for isolating many more components, indicating that automated methods have room for improvement. Interestingly some algorithms, due to built in denoising not included in the ideal de-mixing, were able to isolate some cell time-traces more accurately.

| 80 mW power  | CNMF (999 total) |      |      | Suite2p (639 total) |      |      | PCA/ICA (635 total) |      |      |
|--------------|------------------|------|------|---------------------|------|------|---------------------|------|------|
| Corr. cutoff | >0.1             | >0.3 | >0.5 | >0.1                | >0.3 | >0.5 | >0.1                | >0.3 | >0.5 |
| Paired       | 255              | 226  | 209  | 255                 | 238  | 228  | 167                 | 146  | 136  |
| Unique       | 239              | 222  | 206  | 201                 | 192  | 186  | 139                 | 131  | 128  |
| Doubled      | 15               | 4    | 3    | 32                  | 24   | 22   | 10                  | 7    | 2    |

Supplementary Table 15: Somatic component recovery via automated calcium imaging video segmentation as applied to simulated data generated from NAOMi with 80 mW laser power.

| 80 mW power         | Unique Cells found |      |      |
|---------------------|--------------------|------|------|
| Corr. cutoff        | >0.1               | >0.3 | >0.5 |
| CNMF (999 total)    | 239                | 222  | 206  |
| Suite2p (639 total) | 201                | 192  | 186  |
| PCA/ICA (635 total) | 139                | 131  | 128  |
| CNMF Only           | 51                 | 42   | 33   |
| Suite2p Only        | 15                 | 11   | 11   |
| PCA/ICA Only        | 9                  | 3    | 2    |
| CNMF & Suite2p      | 183                | 178  | 172  |
| CNMF & PCA/ICA      | 132                | 127  | 124  |
| Suite2p & PCA/ICA   | 132                | 128  | 126  |
| All algorithms      | 127                | 125  | 123  |

Supplementary Table 16: Somatic component recovery via automated calcium imaging video segmentation as applied to simulated data generated from NAOMi with 80 mW laser power.

| 80 mW power         | Unique Cells found |      |      |
|---------------------|--------------------|------|------|
| Corr. cutoff        | >0.1               | >0.3 | >0.5 |
| Ideal (8117 total)  | 446                | 363  | 258  |
| Ideal & not CNMF    | 202                | 141  | 53   |
| Ideal & not Suite2p | 240                | 171  | 72   |
| Ideal & not PCA/ICA | 302                | 232  | 130  |
| CNMF & not Ideal    | 0                  | 0    | 1    |
| Suite2p & not Ideal | 0                  | 0    | 0    |
| PCA/ICA & not Ideal | 0                  | 0    | 0    |

Supplementary Table 17: Somatic component recovery via automated calcium imaging video segmentation as applied to simulated data generated from NAOMi with 80 mW laser power.

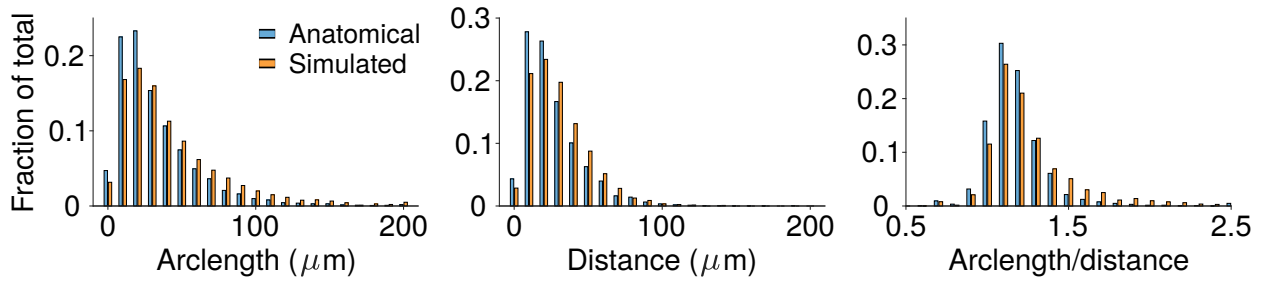

Supplementary Figure 2: Histograms comparing the lengths of vasculature between the NAOMi simulation and observed distributions in data from [106].

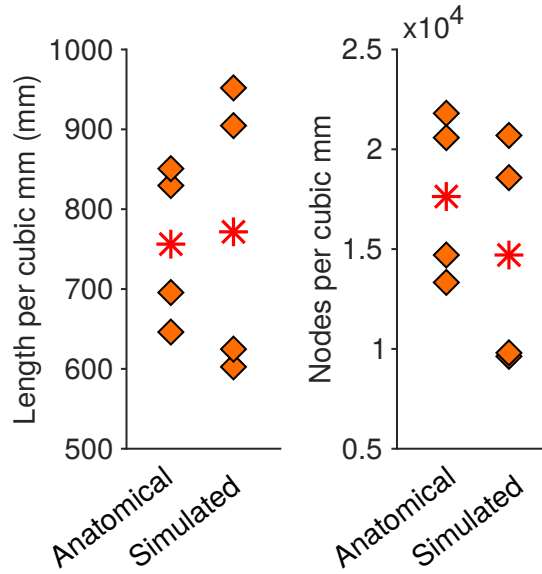

Supplementary Figure 3: Comparison of overall length of the vasculature and the number of vasculature nodes within a cubic mm volume. Comparisons are to observed distributions in data from [106].



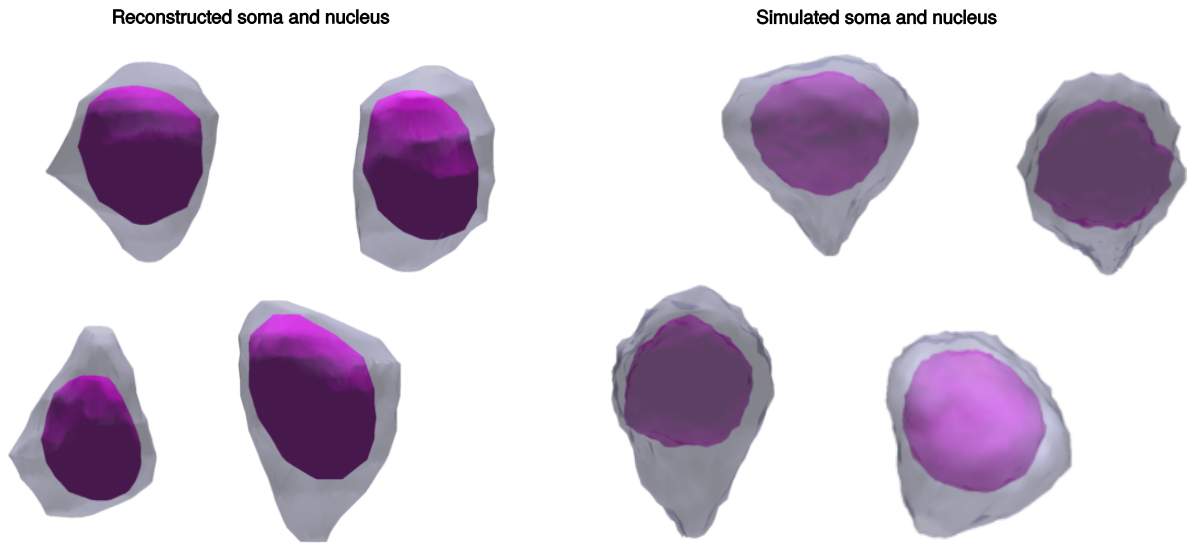

Supplementary Figure 4: Examples of measured and simulated somas. Both measured somas (left) and simulated somas (right) have a bumpy cell wall with one end exhibiting the cone-shaped tightening characteristic of pyramidal cells. The nuclei of both sets of somas (blue shape inside of the red shape) are shrunk and smoothed versions of the exterior cell wall.

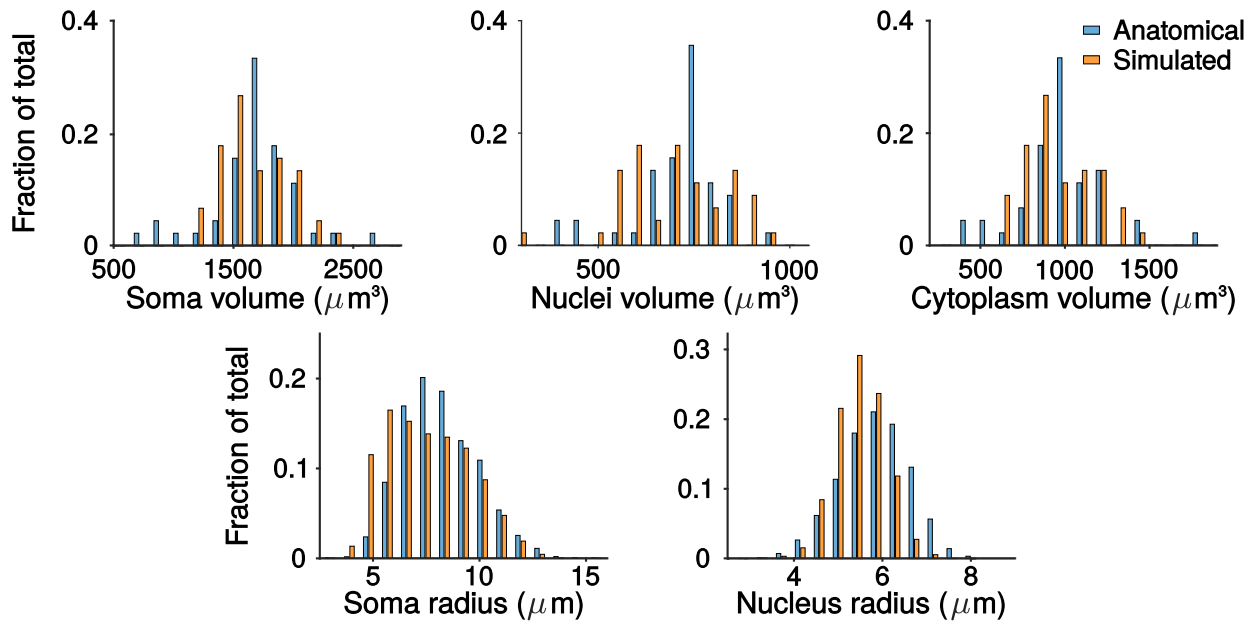

Supplementary Figure 5: Histogram comparing simulated somas with measured anatomy.

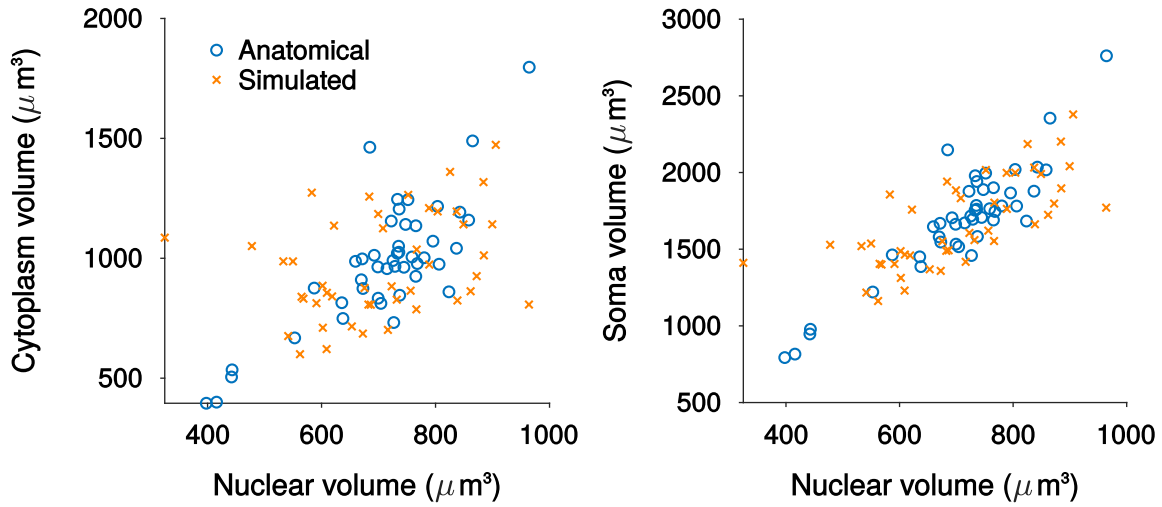

Supplementary Figure 6: Scatter plots comparing the nucleus, soma and cytoplasm volumes for simulated neurons with measured anatomy from EM reconstructions.

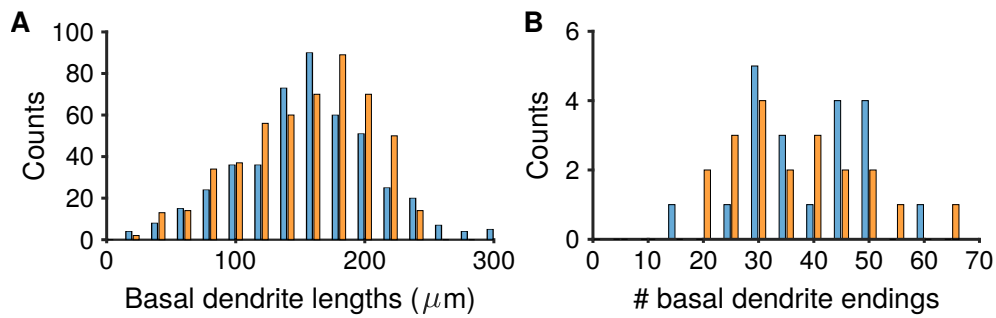

Supplementary Figure 7: A: Histogram of total basal dendrite length per cell from measured [60] and simulated data. B: Histogram of total number of basal dendrite endings

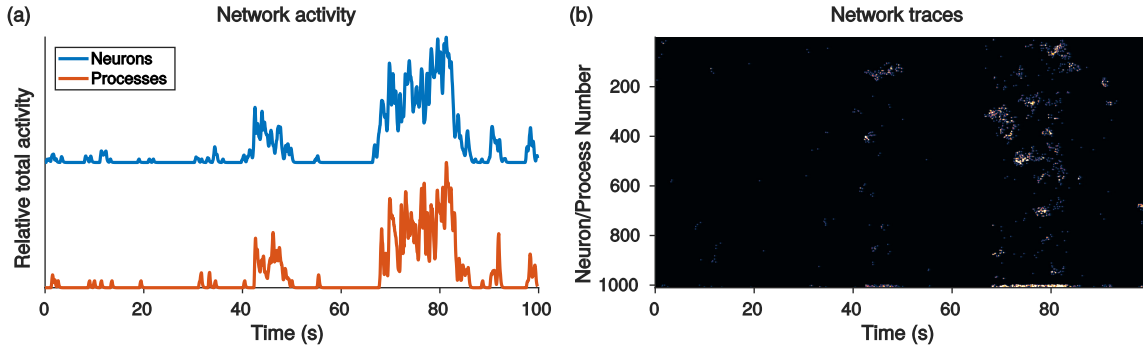

Supplementary Figure 8: Example of a Hawkes point-process. (a) The total activity of the network is correlated with the total activity in the background processes. (b) The Hawkes process gives the network- and single neuron- bursting statistics common in many neural activity recordings.

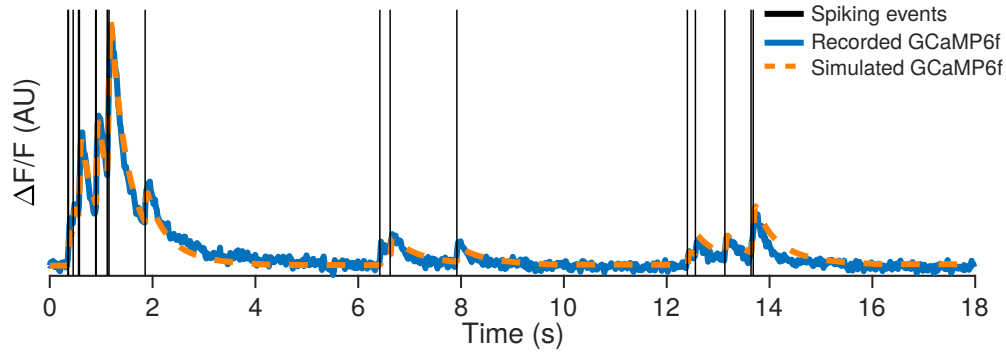

Supplementary Figure 9: Simultaneously recorded spikes and two-photon fluorescence time-course [46] along with the estimated fluorescence timecourse using a forward model of calcium response.

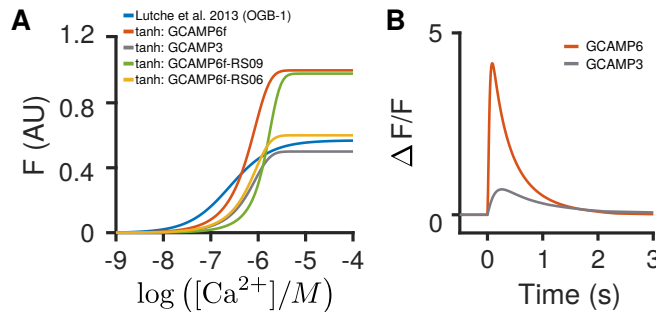

Supplementary Figure 10: A: Example hill plots that can be used in the fluorescence simulation (relating calcium concentration to  $\Delta F/F$ ). The height and slope dictate the saturation and decay behavior. These curves were used for the indicators in [71], using the parameters supplied therein. B: Example  $\Delta F/F$  behavior for GcAMP6f and GcAMP6s in response to a ten-spike burst.

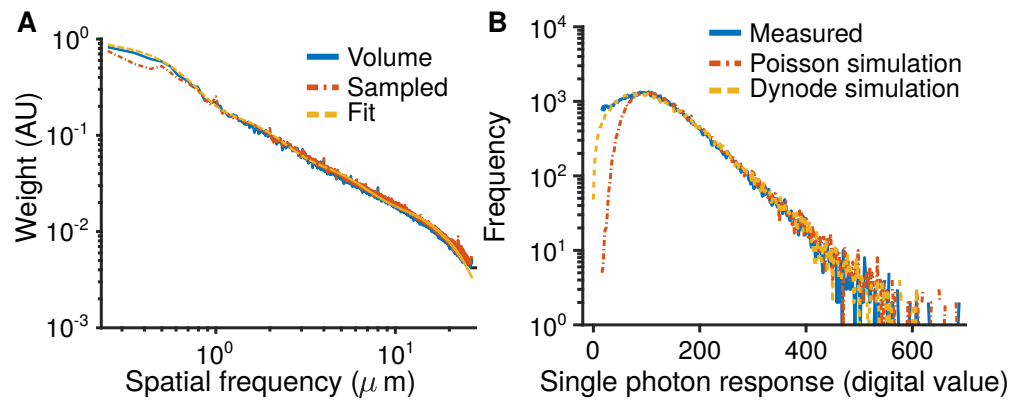

Supplementary Figure 11: A: Spatial frequency weights of an EM volume of mouse visual cortex, the fit to a Gaussian mixture model (GMM), and weights from a 3D Gaussian process sampling using the GMM. B: Measured PMT single photon response digital count distribution as compared to a Poisson amplification model or a dynode amplification model.

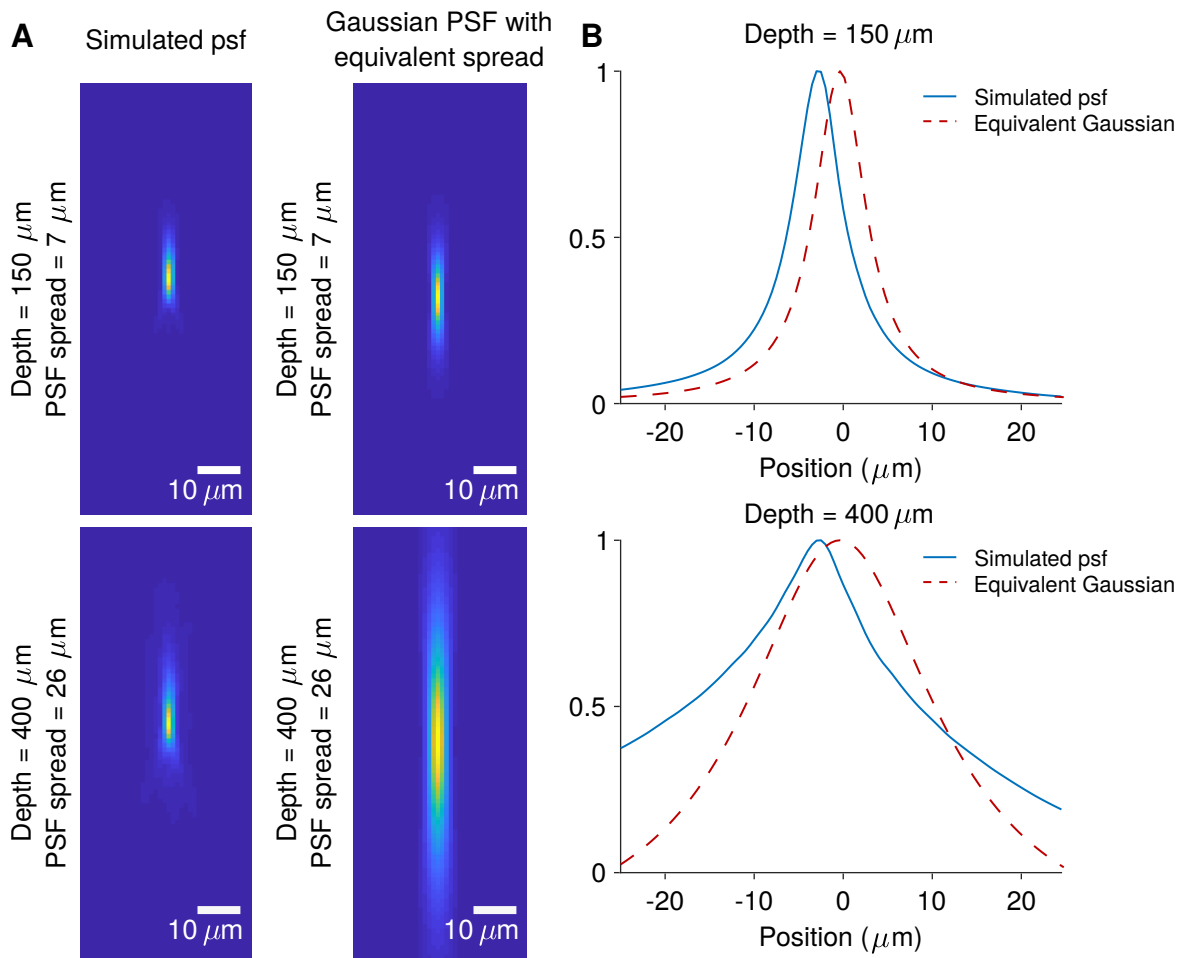

Supplementary Figure 12: A: Simulated NAOMi PSF distributions at 150  $\mu\text{m}$  and 400  $\mu\text{m}$  depths. The full-width half-maximum intensity estimates for these distributions are 7  $\mu\text{m}$  and 26  $\mu\text{m}$  respectively. Simulated two-photon Gaussian beam PSF with 7  $\mu\text{m}$  and 26  $\mu\text{m}$  FWHM. While the shallow volume axial distribution mostly reflects the Gaussian beam PSF, the deeper volume PSF cannot be accurately described with a simple Gaussian beam. Similarly, a Gaussian beam aberrated only with spherical aberration also cannot accurately describe the full PSF (not shown). B: Corresponding cross-sections of the PSFs depicted in panel A.

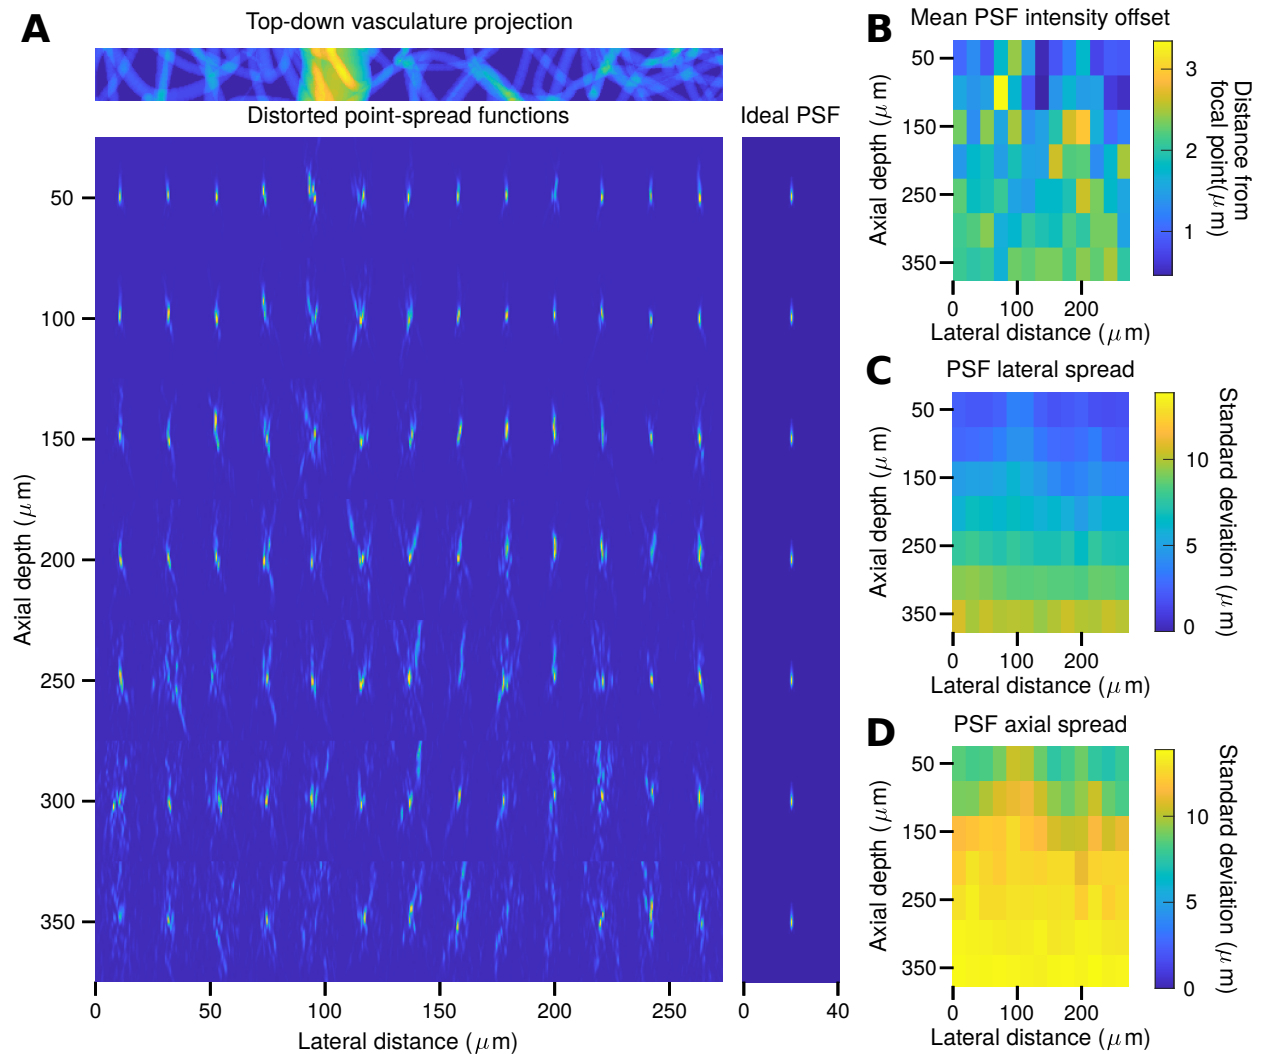

Supplementary Figure 13: Simulated propagation of a point-spread function through layers of diffusing tissue using NAOMi. A: (Top) Axial projection of the vasculature in the simulated tissue. Note the large surface vessel at the  $100\ \mu\text{m}$  mark. (Bottom) Simulated PSFs equally spaced across two  $\approx 2000\ \mu\text{m}$  cross sections of tissue, sampled at  $10\ \mu\text{m}$  spacing. B: Quantitative plot showing the distance of the mean intensity position from the intended focal point of the PSF as a function of location in the volume slice. There is a slight increase in displacement deeper in the volume. C: Comparison of lateral spread (lateral standard deviation of the PSF intensity) as a function of location in the volume. Deeper tissue has a pronounced increase in lateral spread. D: Comparison of axial spread (axial standard deviation of the PSF intensity) as a function of location in the volume. Axial spread grows much faster than lateral spread, in particular in the region directly beneath the blood vessel.

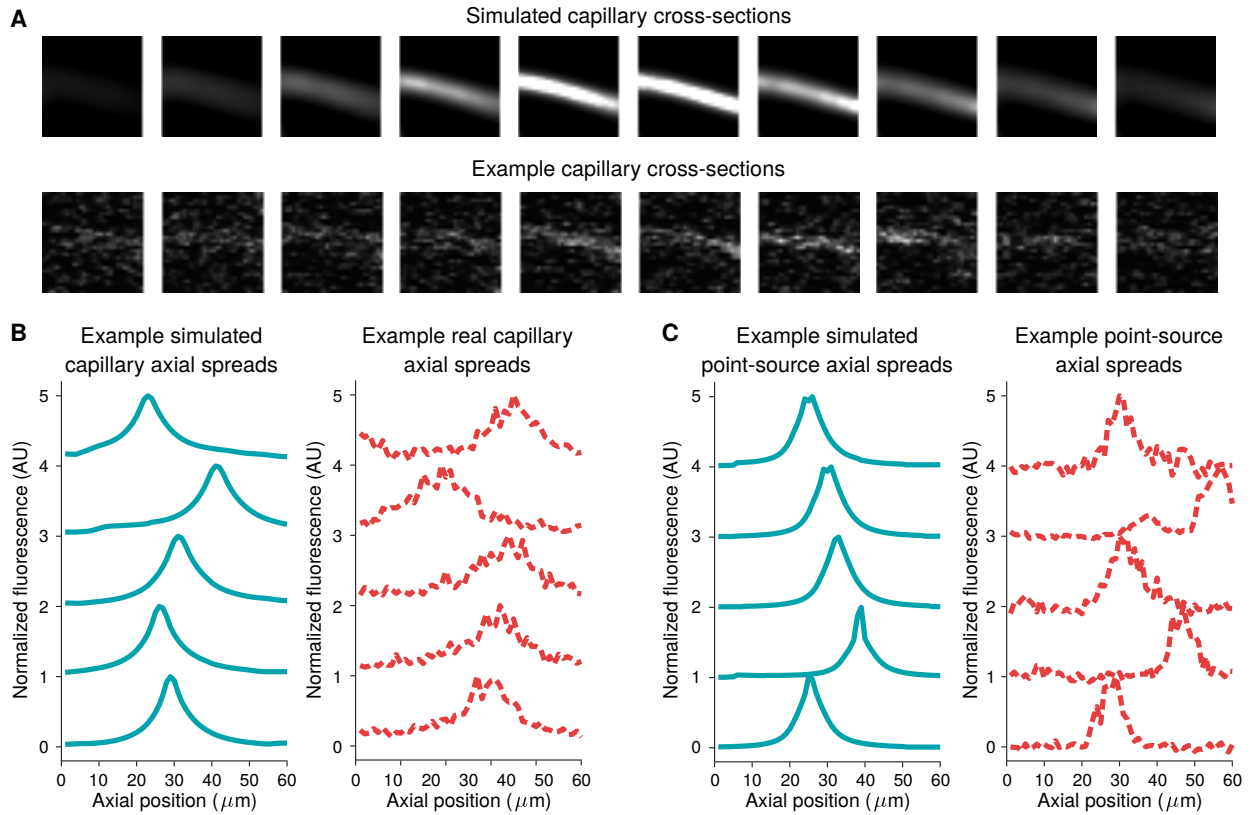

Supplementary Figure 14: A: Example simulated and real capillaries with  $2 \mu\text{m}$  separation between successive images. The width and axial extent of these structures can be used to give an upper bound of and an approximate estimate of the PSF axial spread. Similarly, point sources (not shown) may be used to offer a direct measurement of the PSF in the sample. B: Example distributions for simulated and real axial spread for capillaries at approximately  $330 \mu\text{m}$  in depth. Tissue aberrations increase the spread of the PSF to several times the unaffected width. The estimated spread of the simulated capillaries are  $12.65 \pm 3.60 \mu\text{m}$  (axial) and  $5.33 \pm 0.65 \mu\text{m}$  (lateral) and the real capillaries are  $13.99 \pm 2.29 \mu\text{m}$  (axial) and  $5.60 \pm 0.41$  (lateral). These result in an estimated PSF axial spread of  $9.98 \pm 3.8 \mu\text{m}$  (simulated) and  $11.19 \pm 2.31 \mu\text{m}$  (real). The simulated estimate is comparable to the known axial PSF spread of  $9.13 \mu\text{m}$ . Axial positions are referenced to a position at a depth of  $300 \mu\text{m}$ . C: Similar example distributions for simulated and real axial spread for point sources at approximately  $330 \mu\text{m}$  in depth. The estimated axial spread of the simulated point sources are  $7.15 \pm 2.40 \mu\text{m}$  and the real point sources are  $8.64 \pm 1.34 \mu\text{m}$ . The estimated axial spread of the point sources are lower than the actual value due to the coarse spatial sampling used. Axial positions are referenced to a position at a depth of  $300 \mu\text{m}$ . All numbers given as mean and standard deviation.

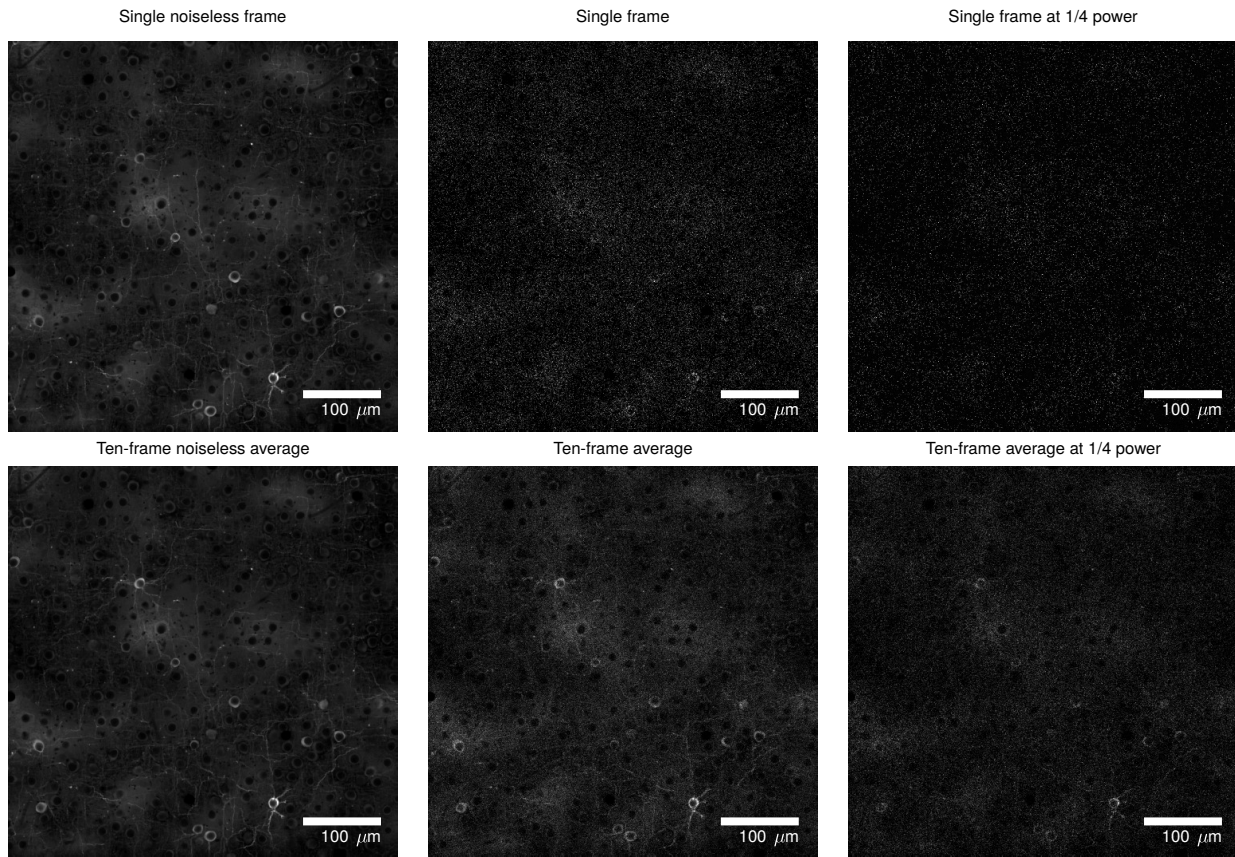

Supplementary Figure 15: Example frames showing the effect of reducing the power of the scanning PSF.

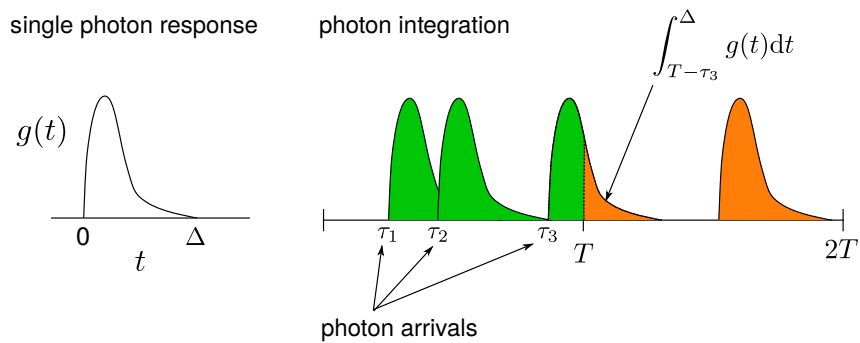

Supplementary Figure 16: Bleed-through of photon responses during TPM electronic analog-to-digital conversion. Left: A single photon causes a response in the electronics that persists over a time frame  $\Delta$ . Right: any photons that arrive within  $\Delta$  of the end of the sampling period cutoff (every  $T$  seconds) have responses that are partially integrated into the current sample (green) and partially integrated into the next sample (orange).



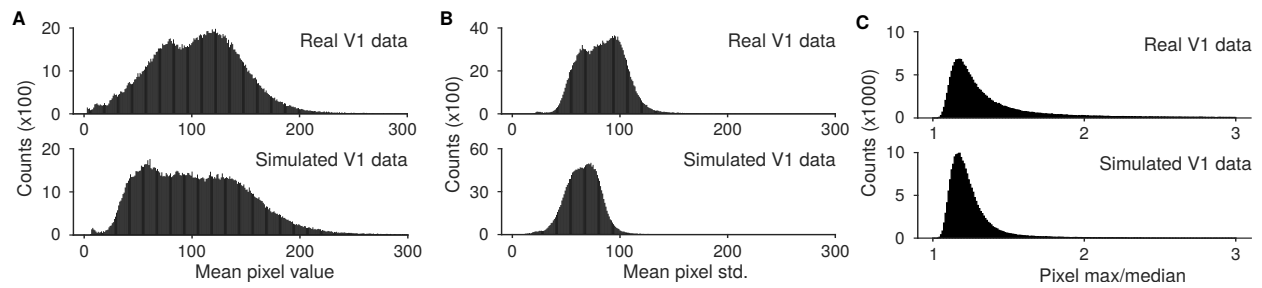

Supplementary Figure 17: A: Histogram of values in the mean image over 20000 frames for both real and simulated V1 data. B: Histogram of standard deviations across the FOV over 2000 frames for both real and simulated V1 data. C: Histogram of the ratio of the maximum value to the median value (approximate estimate of activity) across all pixels in the FOV, calculated over 20000 frames.

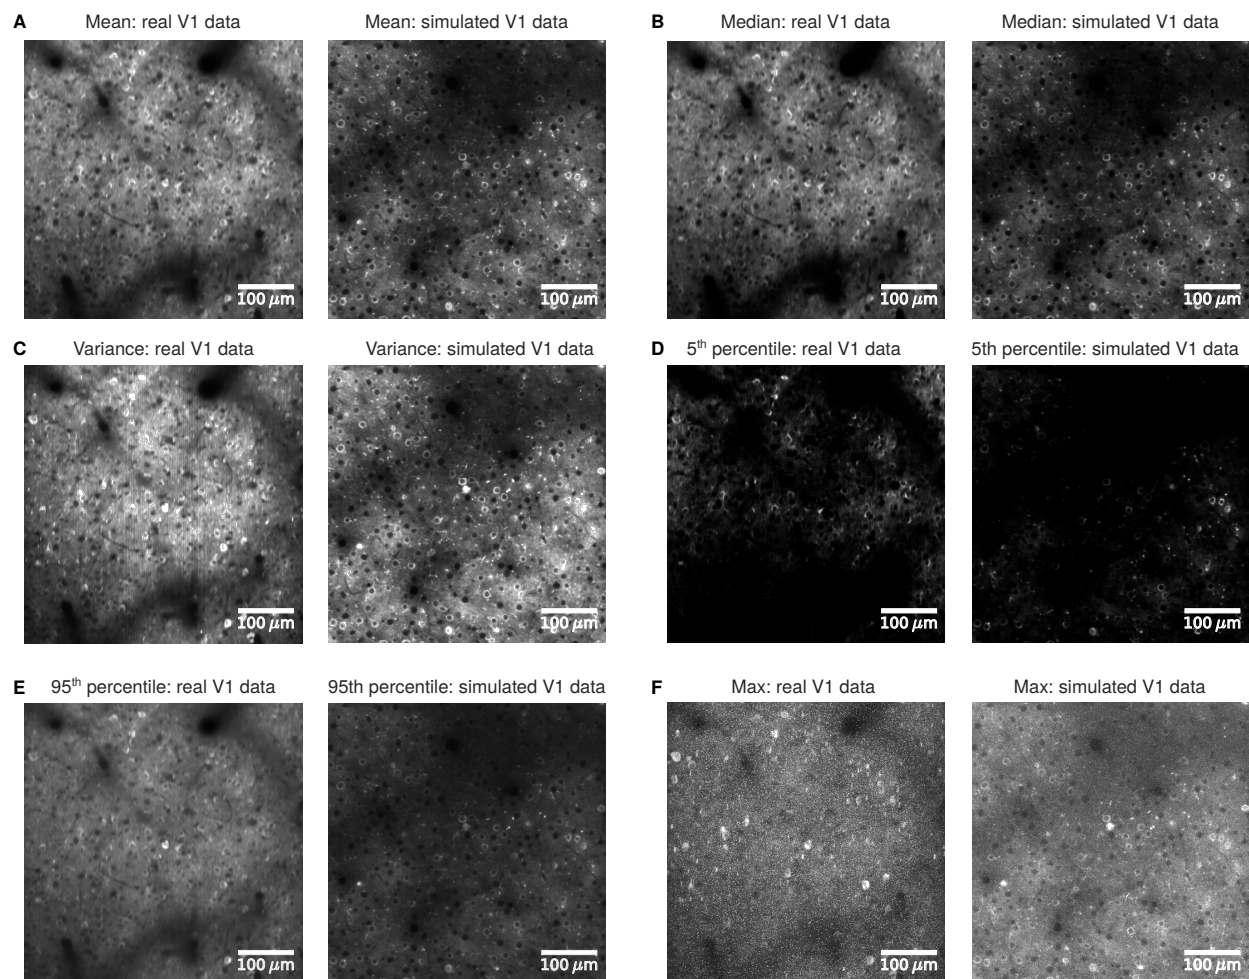

Supplementary Figure 18: Comparisons of different projection images for real V1 and simulated V1 data. A: Mean image (temporal mean of each pixel). B: Median image (temporal median of each pixel). C: Variance image (temporal variance of each pixel). D: 5<sup>th</sup> percentile image (5<sup>th</sup> percentile of each pixel's time trace). E: 95<sup>th</sup> percentile image (95<sup>th</sup> percentile of each pixel's time trace). f: Max image (temporal max of each pixel).

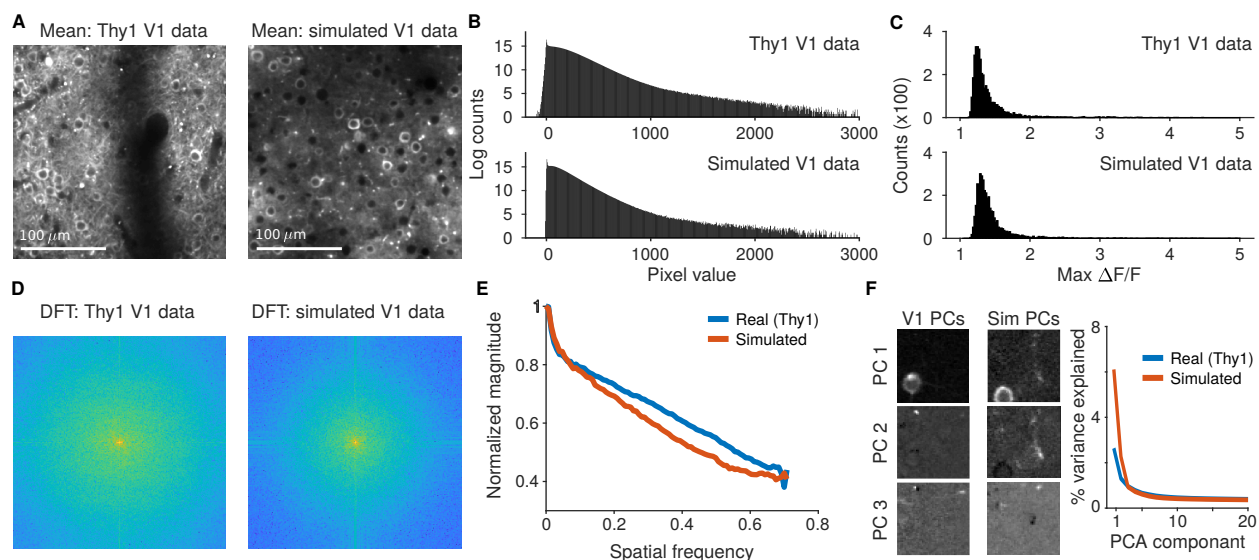

Supplementary Figure 19: Comparison of simulated data to recordings of Thy1 GP5.3 mouse V1 L2/3 using GCaMP6f. A: The mean image for mouse V1 recordings and simulated data. B: Pixel value distributions across the full videos display bimodal peaks and a right log-linear tail. C: Distribution of the maximum  $\Delta F/F$  values across all pixels in the FOV match between the simulated and Thy1 V1 data. D: The spatial frequency content in the mean simulated image captures the qualities of the Thy1 data. Both the spread of frequencies and the tendency for high-frequency components in the fast- and slow- scan directions that result from line-by-line motion and pixel bleed-through are captured. E: The overall contributions at different spatial frequencies to the mean activity matches between the recording and simulation. F: Principal component decompositions for both the Thy1 and simulated data exhibit similar decays in the variance explained per component. The resulting spatial principal components are qualitatively similar.

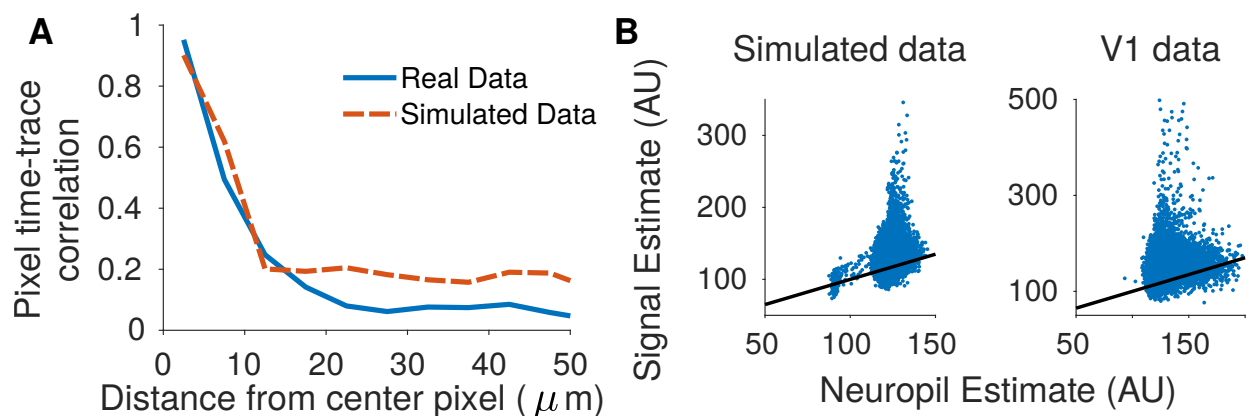

Supplementary Figure 20: Correlation of pixels at a distance from found the time-course of components found using CNMF shows a fall-off consistent between NAOMi simulations and real data. Correlations are highest near the center of the cell and drop off rapidly at a distance, represent neuropil correlations. The black line has a slope of 0.7, indicating general agreement with past observations [34]

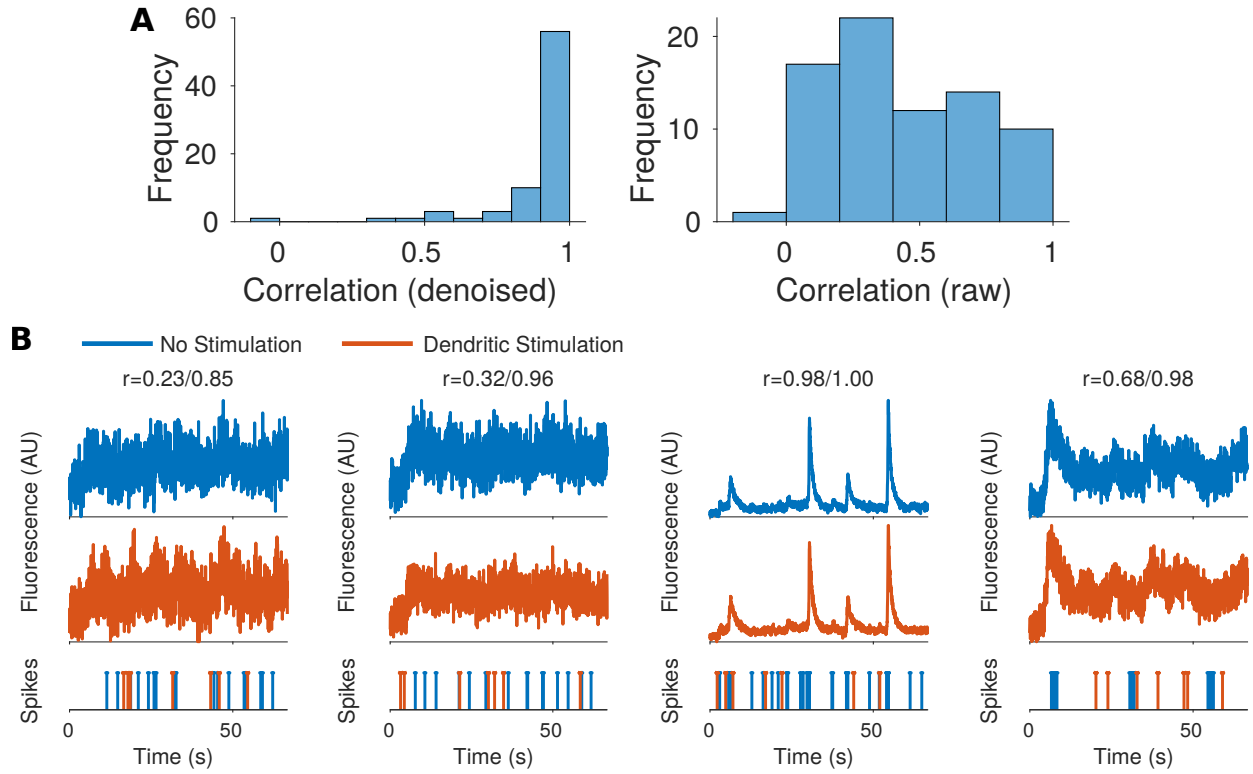

Supplementary Figure 21: Robustness of time-traces to dendritic stimulation. A: Histograms of the correlation coefficients between the ideal traces estimated from the same volume and additional dendritic spikes artificially introduced into the activity for one of the two simulations. Both the raw correlations (right) and the correlation between denoised time-traces (using standard wavelet-based denoising) show that the dendritic spikes do not significantly perturb the inferred traces. B: Example traces with (orange) and without (blue) added dendritic stimulation. Correlation values (raw/denoised) are given above. The spike trains below show the original spike train in blue and the added dendritic spikes in orange that only effect the orange trace above them.

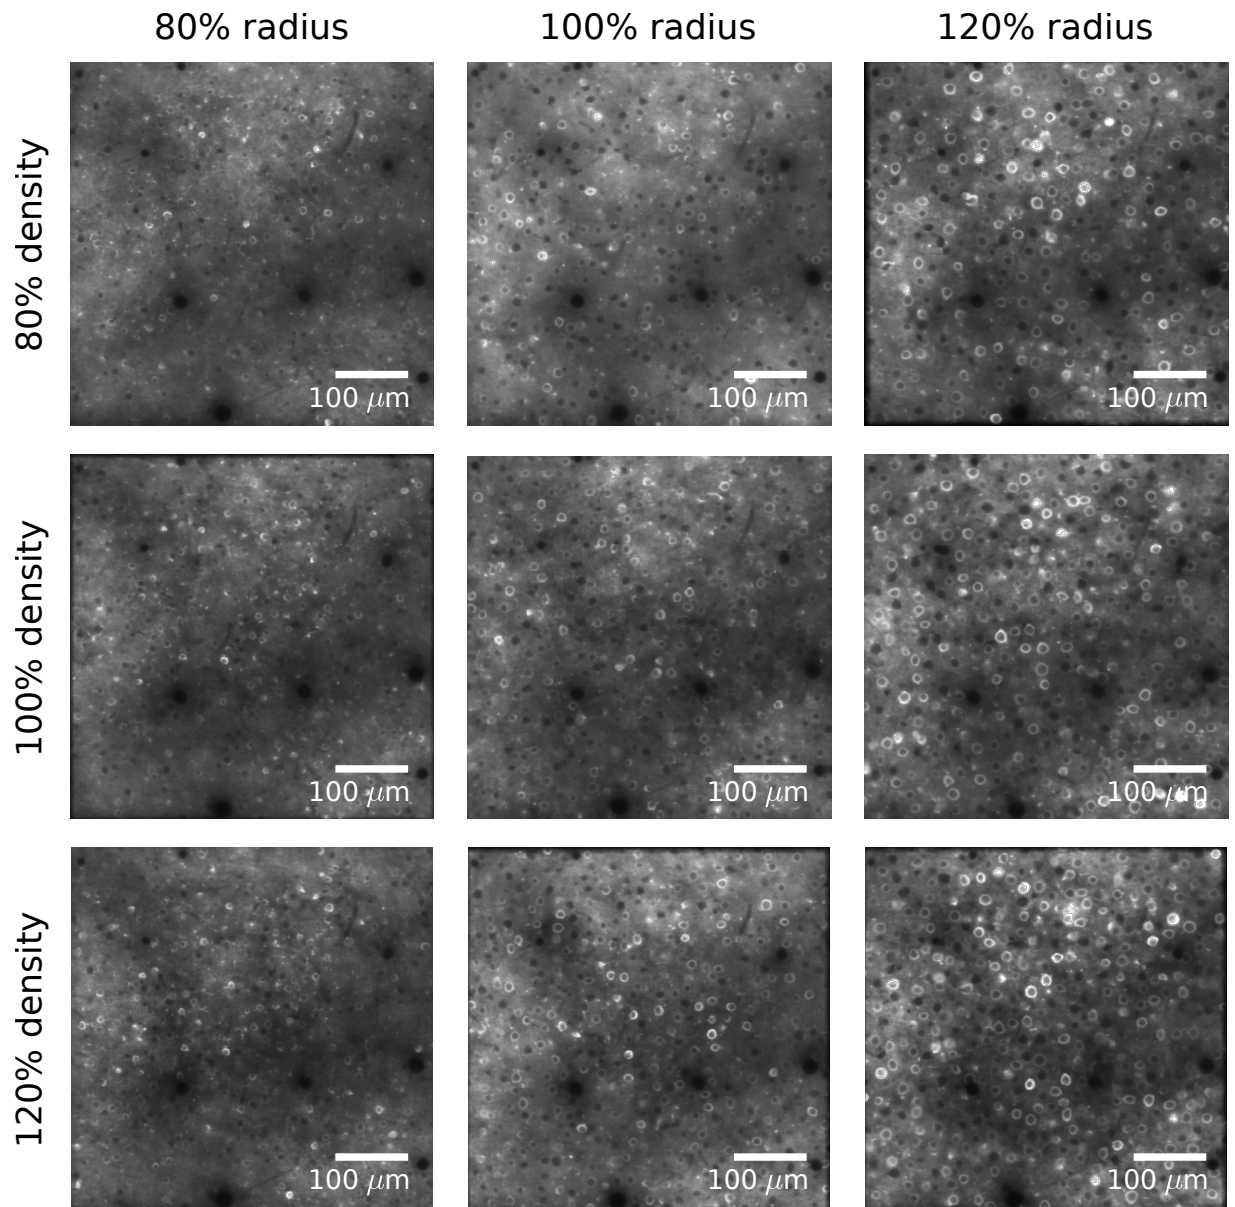

Supplementary Figure 22: Varying the cell size and density in the NAOMi simulation can change the generated video properties. Shown here are the mean images of videos generated by varying the cell size and density by  $\pm 20\%$ . We note that changing the cell size has a much larger impact on the qualitative properties of the observed mean images.

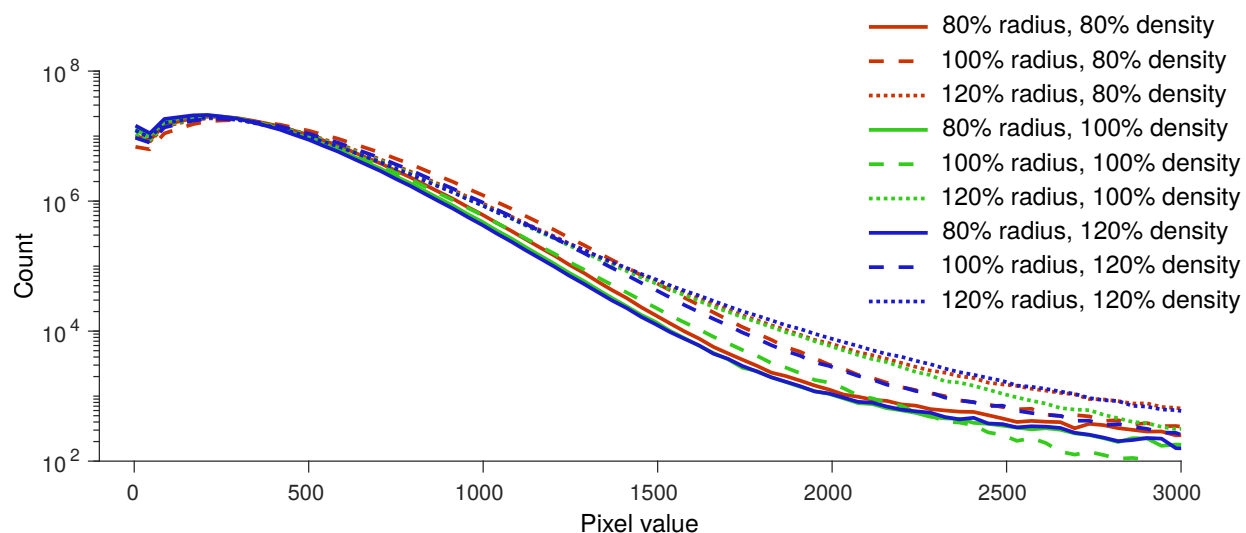

Supplementary Figure 23: Varying the cell size and density in the NAOMi simulation can change the generated video properties. Shown here are the histograms of pixel values for videos generated by varying the cell size and density by  $\pm 20\%$ . Histograms for specific cell sizes tend to cluster together, for example videos with cells enlarged by 20% have heavier tails while cells shrunk by 80% have tighter tails. . Changes in cell density do not seem to have nearly as much of an impact, for example the distributions of values across all densities for videos with 20% larger cells are nearly identical.

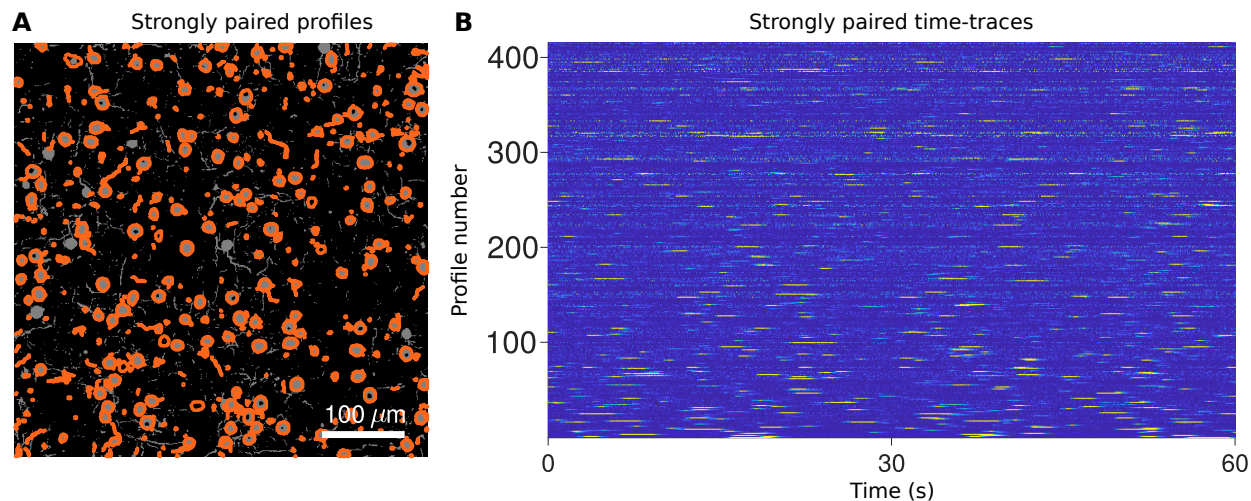

Supplementary Figure 24: Results of using the ideal spatial components to de-mix the simulated TPM video with frame-by-frame least-squares.

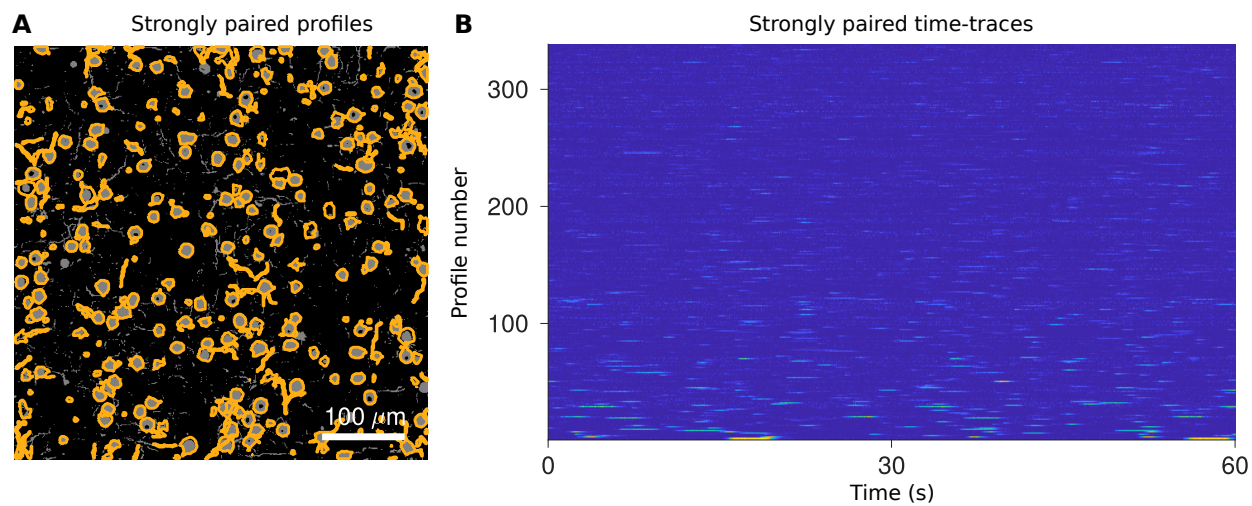

Supplementary Figure 25: Results of using CNMF to analyze the simulated TPM video.

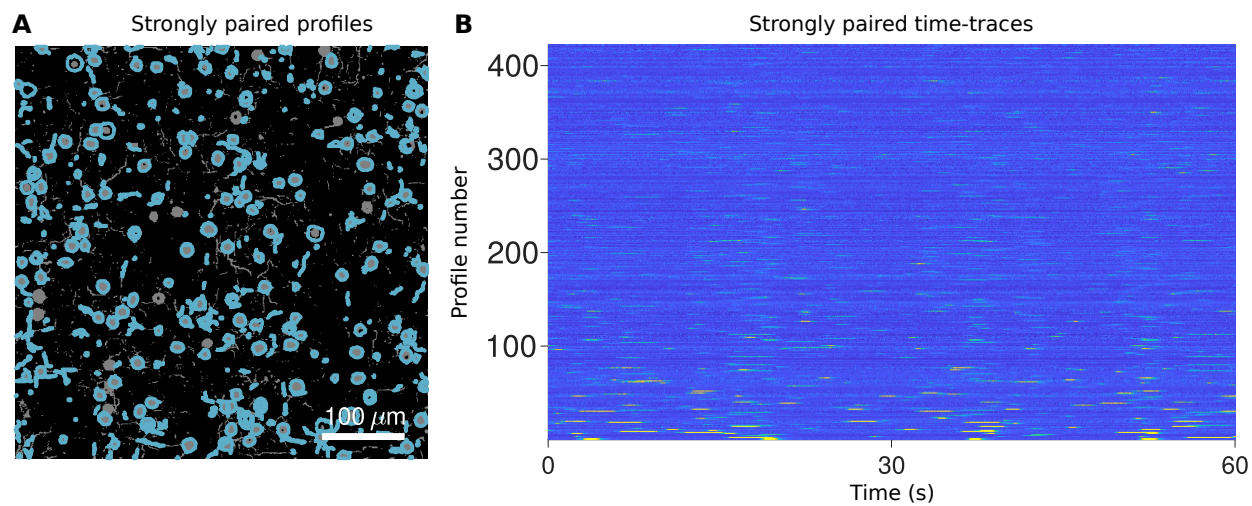

Supplementary Figure 26: Results of using Suite2p to analyze the simulated TPM video.

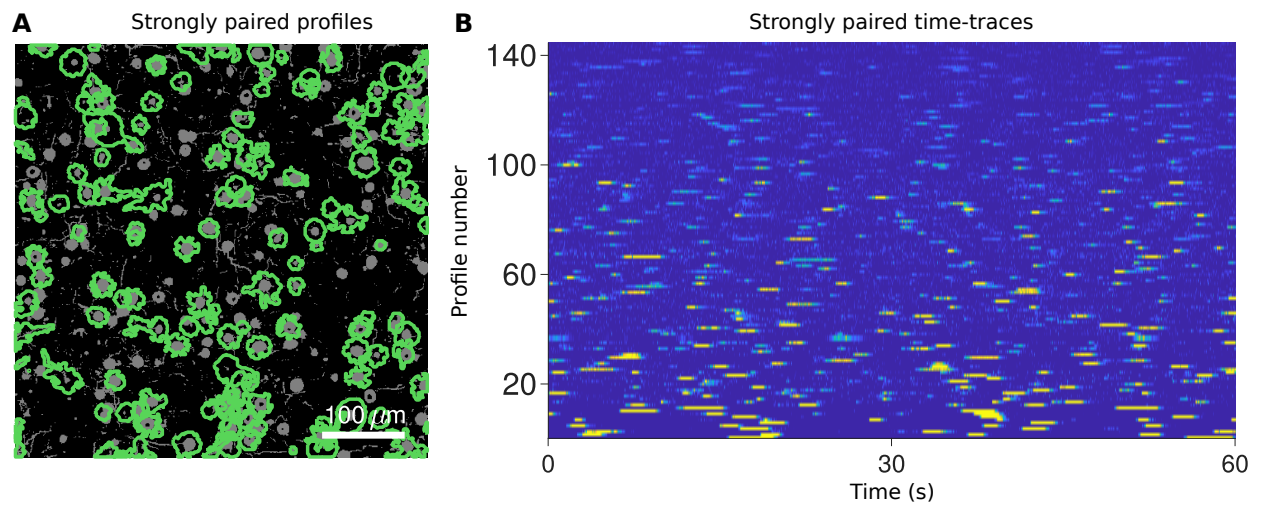

Supplementary Figure 27: Results of using the PCA/ICA to analyze the simulated TPM video.



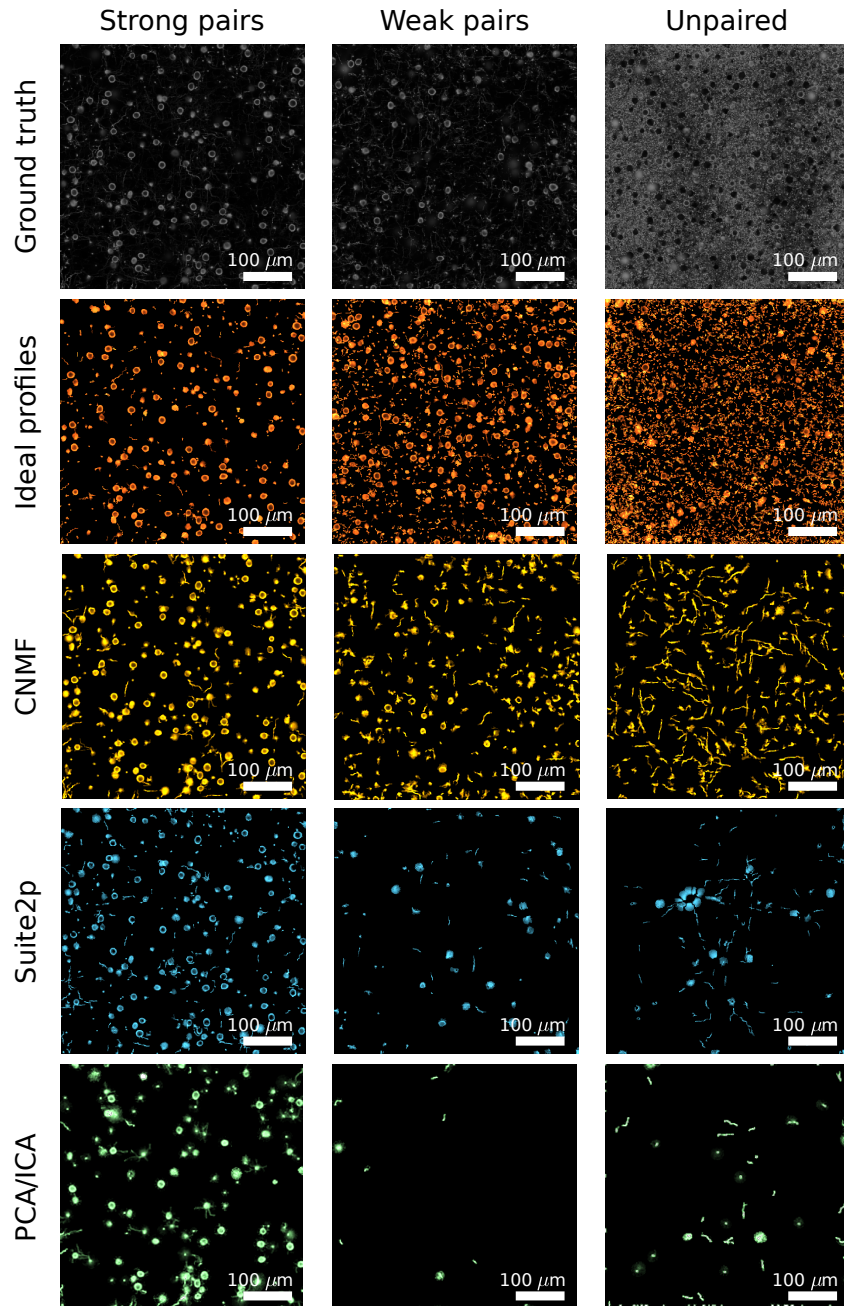

Supplementary Figure 28: Profile shapes for strongly paired profiles ( $\rho > 0.5$ ; left column), weakly paired profiles ( $0.1 < \rho < 0.5$ ; middle column) and unpaired profiles ( $\rho < 0.1$ ; right column). Most cells (top row), were unpaired. Paired cells tended to be found via their somatic signal. CNMF (second row) tended to find the most profiles and matched the most cells. CNMF, however, also found the most false-positives, which tended to be dendritic shapes. Suite2p (third row) found both fewer cells and fewer false positives. PCA/ICA had the lowest number of found cells but still had a significant number of false positives.

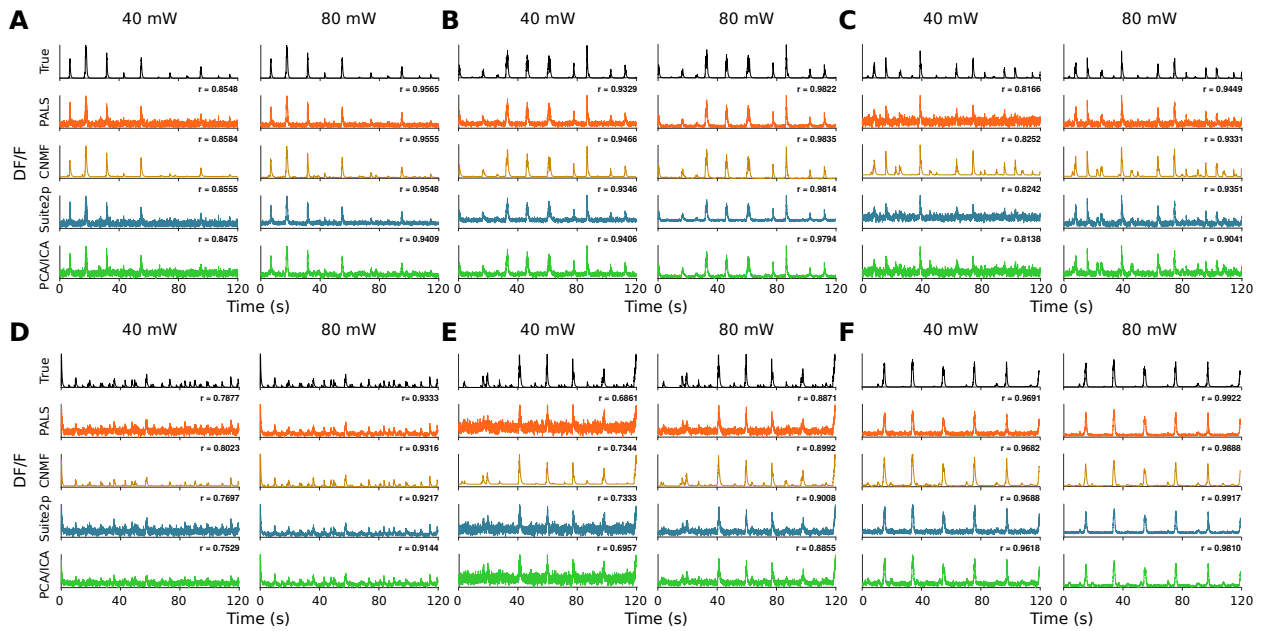

Supplementary Figure 29: Examples of strongly paired time-traces in simulations using 0.6 NA Gaussian beams 40 mW and 80 mW power.

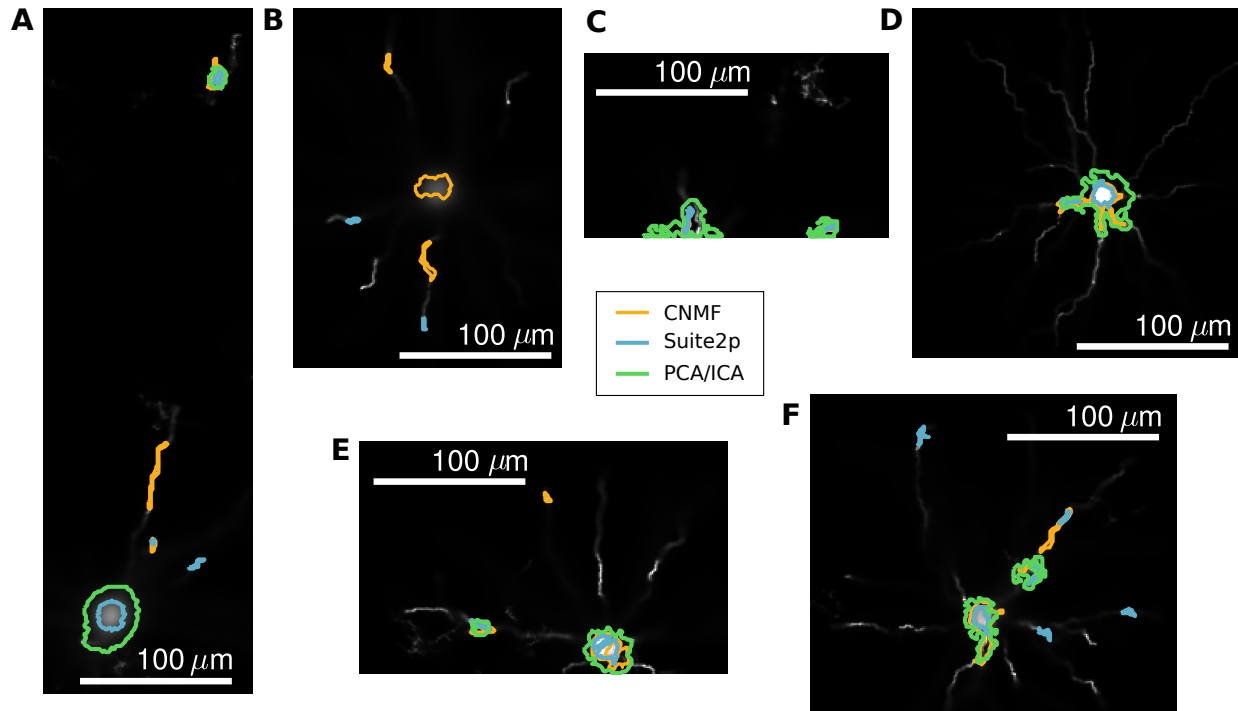

Supplementary Figure 30: Examples of cells that were found with multiplicity by one or more algorithms. A: Such cells can have profiles that are hundreds of  $\mu\text{m}$  away. B: More than two profiles can represent the same cell and often capture dendritic portions away from the soma. C: Such duplicity can happen when the F.O.V. cuts off a portion of the cell. D: Some examples were observed where the dendrite profile and soma profile were very close, where the profiles should have been merged. E: An example where two profiles represent the same soma and overlap. F: All three algorithms are susceptible to the multiplicity effect, proportionally to the number of profiles found.

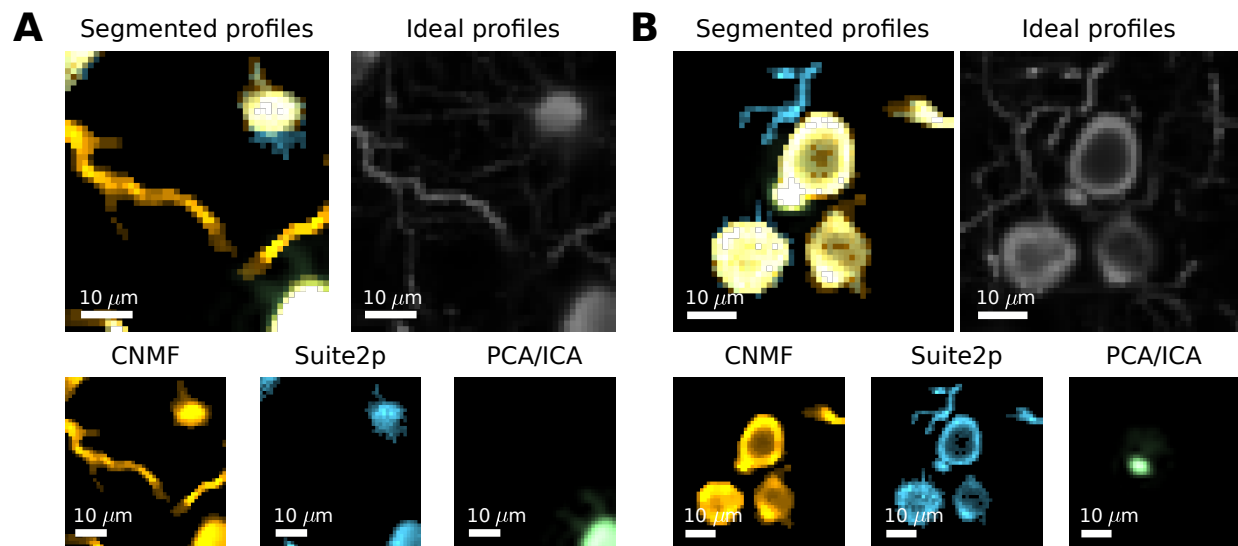

Supplementary Figure 31: Examples of finer features in the segmented profiles. Amongst the profiles found by the three different methods (CNMF in red, Suite2p in blue and PCA/ICA in green) somas were often found by multiple methods while finer features, such as dendrites were often found by only one algorithm. A: A segment containing somas found by both CNMF and Suite2p (one also found using PCA/ICA) and a dendrite found only with CNMF. B: A segment containing somas found by both CNMF and Suite2p (one also found using PCA/ICA) and a dendrite found only with Suite2p.

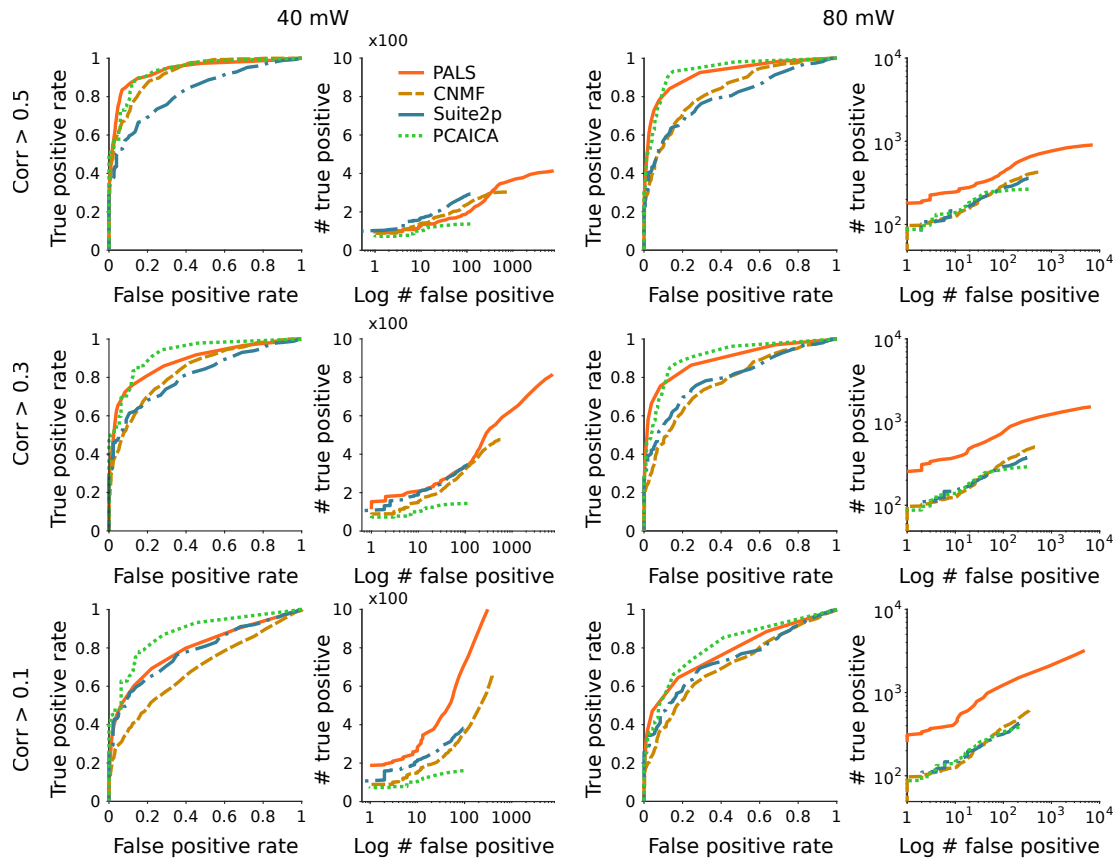

Supplementary Figure 32: Examples ROC curves at different power levels (40 mW on the left and 80 mW on the right) and with different correlation cutoffs for determining true vs. artifact sources (0.1, 0.3, and 0.5 in the three rows). Each set of curves show on the left the rates of true vs. false, as a fraction of the total number of true and artifact cells found by each algorithm, and on the right the total number of true and artifact sources.

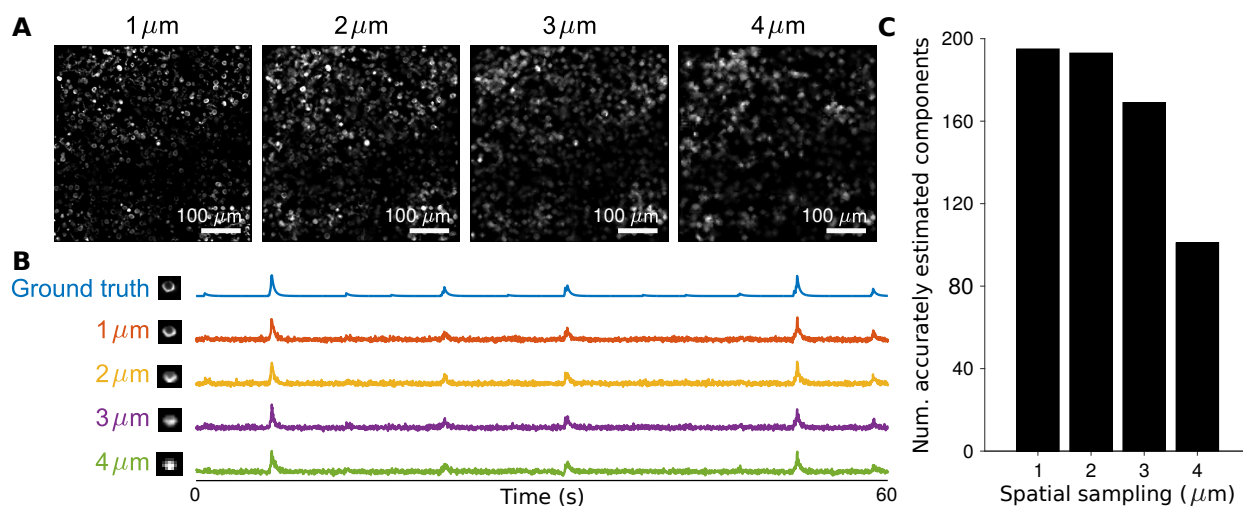

Supplementary Figure 33: Analysis of signal loss as a function of subsampling interval. A: Mean images calculated from imaging movies of the same volume and activity, taken at 1, 2, 3, and 4  $\mu\text{m}$  intervals. B: Example cell spatial profile and time traces at all four image subsampling resolutions, as compared to the ground truth used to generate the data. C: Comparison of the number of cells confidently found (correlation  $> 0.5$ ) at all four resolutions indicate a steep fall-off after 3  $\mu\text{m}$  subsampling.

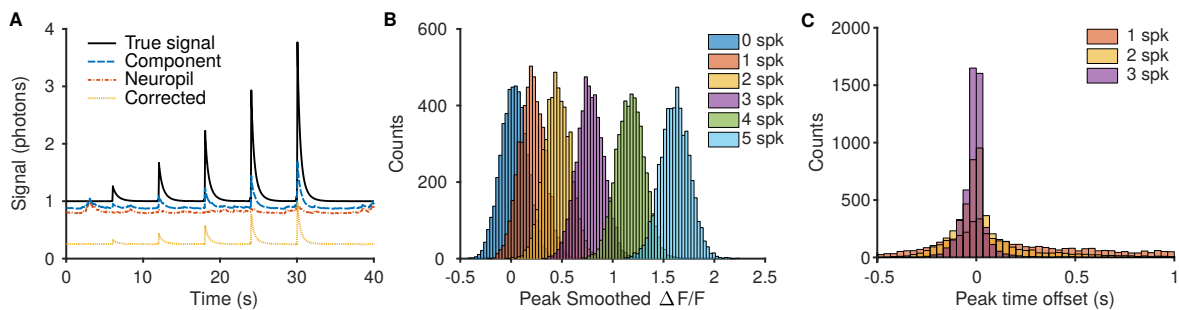

Supplementary Figure 34: Comparison of resulting  $\Delta F/F$  distinguishability for bursts of different spike numbers. A: Simulations were run by generating videos with preset spiking activity that ramped up the number of spikes in each burst. Much of the error in recovered component time-traces can be attributed to insufficiently removed neuropil, and using algorithmic techniques such as in Suite2P [18] can increase the accuracy of the time traces. B: The recovered  $\Delta F/F$  for larger bursts was more reliable and more separable between the different burst strengths. For example there is less overlap between the peak  $\Delta F/F$  for 5- and 4-spike bursts than for 1- and 2-spike bursts. C: The peak  $\Delta F/F$  offset time is also more reliable for bursts with more spikes.

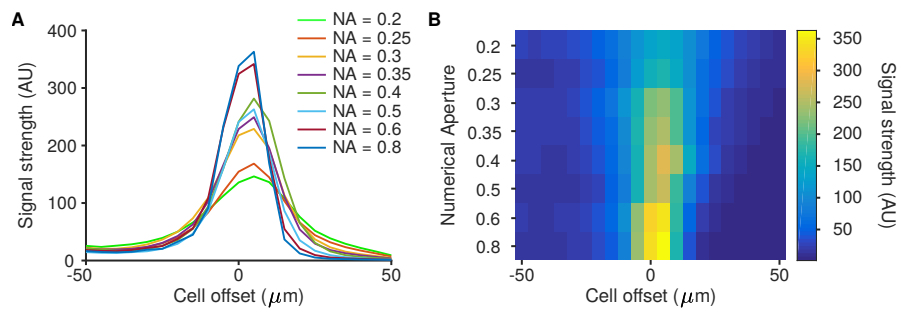

Supplementary Figure 35: Distribution of somatic signal to numerical aperture (NA) and position. Signal is defined as the square of the component somatic fluorescence divided by the baseline fluorescence and reflects the overall relative detectability of a component. A: Signal strength drops off as a function of the displacement of the cell from the peak PSF excitation. B: Same data plotted as an image to better compare spread and peak intensity of the various curves.

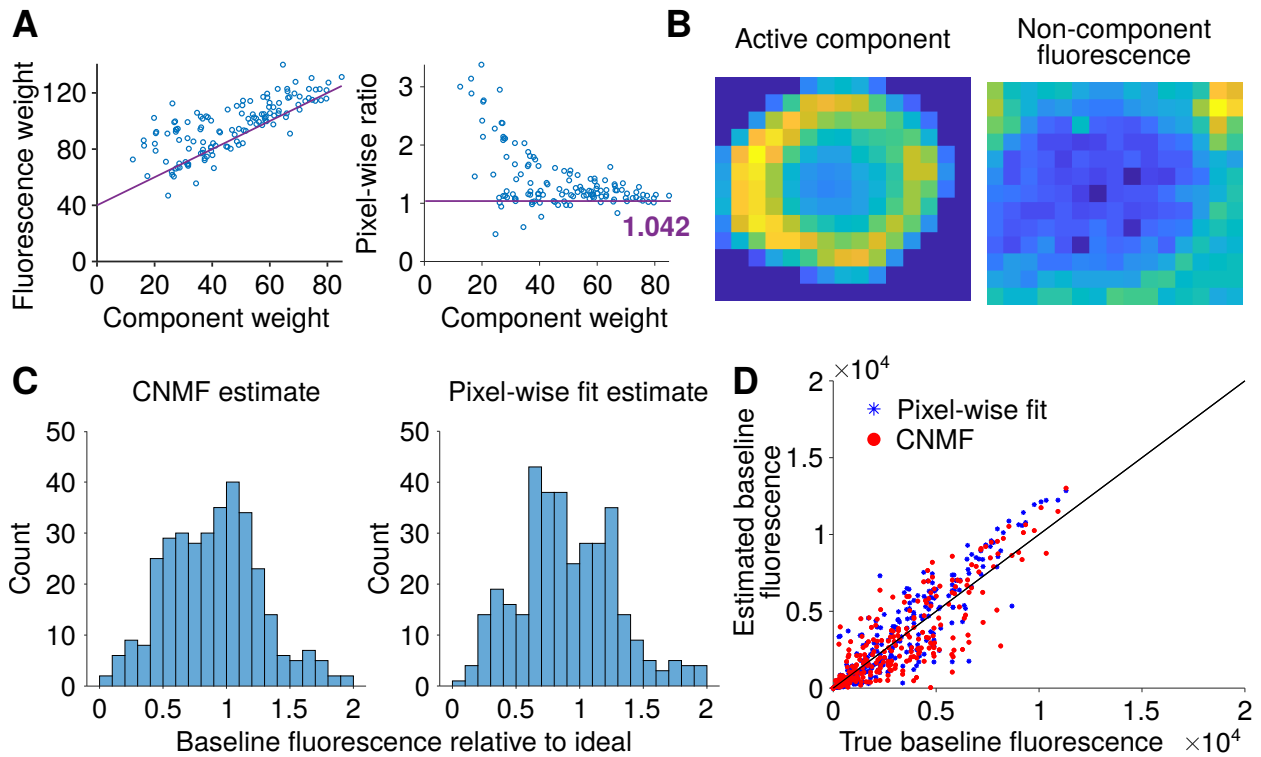

Supplementary Figure 36: Baseline fluorescence ratio estimation validation using NAOMi simulations. A: (Left) Scatterplot of pixel-wise fluorescence of the modal image to the active component fluorescence. Fitted line indicates estimate of minimum noncomponent fluorescence value and slope of component weight. (right) Scatterplot of pixelwise ratio modal values corrected by fitted line to active component fluorescence. B: (Left) Active component fluorescence (Right) estimated corrected noncomponent fluorescence. C: (Left) Histogram of the estimation of the baseline as per CNMF’s internal algorithm. (Right) Histogram of the baseline as per a statistical estimate using the internal pixels (see Methods). D: Scatterplot depicting the accuracy of the baseline estimates with respect to the “ground truth” baseline.
